# Supplementary material for: High expression of HSP90 is associated with poor prognosis in patients with colorectal cancer
Source: PeerJ. 2019 Oct 31;7:e7946. doi: 10.7717/peerj.7946 (PMC6825748; doi:10.7717/peerj.7946)
Supplement: Supplemental Information 2 — Pearson’s correlation coefficient ≥ 0.4, P < 0.0001. [file peerj-07-7946-s002.xlsx]

## Sheet: Sheet1
GS	cor_r	cor_p
HSP90AA1	1	0
AHSA1	0.662176	1.47639e-49
EIF2S1	0.626782	4.34839e-43
PRMT5	0.609705	2.95888e-40
CPSF2	0.594409	7.35103e-38
SUPT16H	0.564161	1.75132e-33
SNW1	0.559732	7.03089e-33
WDHD1	0.555	3.03448e-32
TMX1	0.527362	9.91124e-29
MED6	0.519981	7.60608e-28
VRK1	0.519644	8.33579e-28
YY1	0.515472	2.57713e-27
ALKBH1	0.511608	7.23069e-27
TRMT5	0.508167	1.79201e-26
SNAPC1	0.50658	2.714e-26
EIF5	0.503571	5.92728e-26
PARP2	0.502302	8.22098e-26
DLGAP5	0.50096	1.16017e-25
FKBP3	0.493785	7.13179e-25
PSMA6	0.491608	1.22689e-24
PSMA3	0.491444	1.27789e-24
L2HGDH	0.489911	1.86764e-24
PPP4R3A	0.48988	1.88226e-24
FCF1	0.4864	4.42328e-24
MTHFD1	0.484839	6.4686e-24
EIF2B2	0.484731	6.64037e-24
UBR7	0.484052	7.82786e-24
ZC3H14	0.483122	9.80382e-24
PSMC6	0.480246	1.95733e-23
HNRNPC	0.480046	2.05321e-23
ERH	0.474153	8.2872e-23
DLST	0.473522	9.60707e-23
PAPOLA	0.473049	1.07313e-22
DDX24	0.472828	1.12988e-22
GLRX5	0.471116	1.68327e-22
TDP1	0.469261	2.58606e-22
CINP	0.468767	2.89749e-22
EXOC5	0.467452	3.92071e-22
FNTB	0.467439	3.93246e-22
CDCA4	0.465772	5.75807e-22
TMED10	0.459139	2.57196e-21
BAG5	0.458322	3.08611e-21
MNAT1	0.457956	3.3478e-21
G2E3	0.455951	5.22067e-21
WDR89	0.454605	7.02322e-21
SRP54	0.452653	1.07748e-20
RCOR1	0.447847	3.05333e-20
TTC5	0.444562	6.16485e-20
MARK3	0.443264	8.12121e-20
PSMC1	0.442279	1.00025e-19
STYX	0.441482	1.18319e-19
EXD2	0.438844	2.05736e-19
RDH11	0.437496	2.72433e-19
CALM1	0.436378	3.4353e-19
RPL36AL	0.434371	5.19787e-19
NGDN	0.433862	5.77127e-19
MPP5	0.432697	7.32701e-19
GNPNAT1	0.430115	1.23979e-18
APEX1	0.429837	1.31163e-18
GPHN	0.429824	1.31506e-18
SNX6	0.429792	1.32383e-18
DNAJA1	0.428631	1.67408e-18
AP4S1	0.428556	1.69935e-18
CDKN3	0.428229	1.81536e-18
BRMS1L	0.424676	3.69951e-18
PNP	0.424542	3.79903e-18
ARF6	0.423735	4.46061e-18
ZNF410	0.423434	4.73539e-18
PPP2R5E	0.422799	5.3703e-18
VTI1B	0.422352	5.86644e-18
RTRAF	0.422043	6.23587e-18
NAA30	0.41979	9.7131e-18
BAZ1A	0.416124	1.98346e-17
COQ6	0.415832	2.09896e-17
ERO1A	0.414238	2.8541e-17
RBM25	0.412713	3.82407e-17
TTLL5	0.412232	4.19277e-17
PLEK2	0.411858	4.50306e-17
FUT8	0.411123	5.18071e-17
KLC1	0.405624	1.4615e-16
SCFD1	0.405413	1.52025e-16
GMFB	0.404101	1.94136e-16
POLE2	0.402942	2.40727e-16
KIAA0586	0.402622	2.55424e-16
ISCA2	0.401328	3.24353e-16
SETD3	0.400793	3.57898e-16
