# Supplementary material for: High expression of HSP90 is associated with poor prognosis in patients with colorectal cancer
Source: PeerJ. 2019 Oct 31;7:e7946. doi: 10.7717/peerj.7946 (PMC6825748; doi:10.7717/peerj.7946)
Supplement: Supplemental Information 3 — Pearson’s correlation coefficient of all the genes from TCGA dataset. [file peerj-07-7946-s003.xlsx]

## Sheet: HSP90a_cor_res
GS	cor_r	cor_p
HSP90AA1	1	0
AHSA1	0.662176	1.47639e-49
EIF2S1	0.626782	4.34839e-43
PRMT5	0.609705	2.95888e-40
CPSF2	0.594409	7.35103e-38
SUPT16H	0.564161	1.75132e-33
SNW1	0.559732	7.03089e-33
WDHD1	0.555	3.03448e-32
TMX1	0.527362	9.91124e-29
MED6	0.519981	7.60608e-28
VRK1	0.519644	8.33579e-28
YY1	0.515472	2.57713e-27
ALKBH1	0.511608	7.23069e-27
TRMT5	0.508167	1.79201e-26
SNAPC1	0.50658	2.714e-26
EIF5	0.503571	5.92728e-26
PARP2	0.502302	8.22098e-26
DLGAP5	0.50096	1.16017e-25
FKBP3	0.493785	7.13179e-25
PSMA6	0.491608	1.22689e-24
PSMA3	0.491444	1.27789e-24
L2HGDH	0.489911	1.86764e-24
PPP4R3A	0.48988	1.88226e-24
FCF1	0.4864	4.42328e-24
MTHFD1	0.484839	6.4686e-24
EIF2B2	0.484731	6.64037e-24
UBR7	0.484052	7.82786e-24
ZC3H14	0.483122	9.80382e-24
PSMC6	0.480246	1.95733e-23
HNRNPC	0.480046	2.05321e-23
ERH	0.474153	8.2872e-23
DLST	0.473522	9.60707e-23
PAPOLA	0.473049	1.07313e-22
DDX24	0.472828	1.12988e-22
GLRX5	0.471116	1.68327e-22
TDP1	0.469261	2.58606e-22
CINP	0.468767	2.89749e-22
EXOC5	0.467452	3.92071e-22
FNTB	0.467439	3.93246e-22
CDCA4	0.465772	5.75807e-22
TMED10	0.459139	2.57196e-21
BAG5	0.458322	3.08611e-21
MNAT1	0.457956	3.3478e-21
G2E3	0.455951	5.22067e-21
WDR89	0.454605	7.02322e-21
SRP54	0.452653	1.07748e-20
RCOR1	0.447847	3.05333e-20
TTC5	0.444562	6.16485e-20
MARK3	0.443264	8.12121e-20
PSMC1	0.442279	1.00025e-19
STYX	0.441482	1.18319e-19
EXD2	0.438844	2.05736e-19
RDH11	0.437496	2.72433e-19
CALM1	0.436378	3.4353e-19
RPL36AL	0.434371	5.19787e-19
NGDN	0.433862	5.77127e-19
MPP5	0.432697	7.32701e-19
GNPNAT1	0.430115	1.23979e-18
APEX1	0.429837	1.31163e-18
GPHN	0.429824	1.31506e-18
SNX6	0.429792	1.32383e-18
DNAJA1	0.428631	1.67408e-18
AP4S1	0.428556	1.69935e-18
CDKN3	0.428229	1.81536e-18
BRMS1L	0.424676	3.69951e-18
PNP	0.424542	3.79903e-18
ARF6	0.423735	4.46061e-18
ZNF410	0.423434	4.73539e-18
PPP2R5E	0.422799	5.3703e-18
VTI1B	0.422352	5.86644e-18
RTRAF	0.422043	6.23587e-18
NAA30	0.41979	9.7131e-18
BAZ1A	0.416124	1.98346e-17
COQ6	0.415832	2.09896e-17
ERO1A	0.414238	2.8541e-17
RBM25	0.412713	3.82407e-17
TTLL5	0.412232	4.19277e-17
PLEK2	0.411858	4.50306e-17
FUT8	0.411123	5.18071e-17
KLC1	0.405624	1.4615e-16
SCFD1	0.405413	1.52025e-16
GMFB	0.404101	1.94136e-16
POLE2	0.402942	2.40727e-16
KIAA0586	0.402622	2.55424e-16
ISCA2	0.401328	3.24353e-16
SETD3	0.400793	3.57898e-16
PRORP	0.398625	5.32373e-16
FANCM	0.398569	5.37879e-16
C14ORF119	0.397604	6.41273e-16
STRN3	0.396567	7.74133e-16
USP13	0.395245	9.83194e-16
LIN52	0.395224	9.87009e-16
WDR20	0.393344	1.38402e-15
HSP90B1	0.39283	1.51745e-15
RBM8A	0.391707	1.8545e-15
TTC8	0.391115	2.06073e-15
FBXO33	0.390502	2.29827e-15
EIF4A1	0.389937	2.54054e-15
CEP78	0.388198	3.4543e-15
SLC39A9	0.38764	3.81062e-15
TYW3	0.387253	4.07917e-15
P4HA1	0.386797	4.41841e-15
CCNK	0.386571	4.59739e-15
NEDD8	0.386411	4.7277e-15
HSPA8	0.385496	5.54786e-15
TMED10P1	0.385323	5.71801e-15
PCCB	0.385053	5.99448e-15
PSMB5	0.384601	6.48461e-15
TIPIN	0.381371	1.13422e-14
DAD1	0.381186	1.1709e-14
HSPD1	0.380433	1.33268e-14
PTGES3	0.379949	1.44795e-14
CHAC2	0.379558	1.54818e-14
SPTLC2	0.379508	1.56148e-14
HSPA5	0.379243	1.63362e-14
ERG28	0.379167	1.65501e-14
ATP5MPL	0.378387	1.89078e-14
COX16	0.378201	1.95164e-14
EIF5AL1	0.377757	2.1045e-14
IPO4	0.377199	2.31373e-14
METAP2	0.376292	2.69788e-14
MRPL52	0.373577	4.26162e-14
ZWILCH	0.372827	4.83167e-14
ILF2	0.371919	5.62183e-14
GDAP1	0.370193	7.48839e-14
RBM23	0.368859	9.33557e-14
TRA2B	0.367966	1.08132e-13
SNRPD1	0.367497	1.16788e-13
GOLGA5	0.367079	1.25074e-13
TMED8	0.366143	1.45779e-13
TSR1	0.365785	1.54552e-13
KRR1	0.364975	1.76335e-13
HSPA4L	0.363826	2.12504e-13
FKBP4	0.363087	2.39484e-13
XRCC3	0.362442	2.65743e-13
NUMB	0.360146	3.84206e-13
POLR3G	0.358235	5.2101e-13
LEO1	0.357888	5.50569e-13
MGAT2	0.355791	7.66879e-13
ANP32A	0.355256	8.34268e-13
WDR25	0.355072	8.58732e-13
UBB	0.354732	9.05863e-13
RIOX1	0.353488	1.10061e-12
ACTR10	0.353025	1.18322e-12
SCO1	0.353019	1.18419e-12
PRPF4	0.35282	1.22165e-12
RHOV	0.352512	1.28161e-12
MAP3K9	0.352488	1.2865e-12
ANP32E	0.352271	1.33067e-12
RAN	0.350697	1.69855e-12
TOX4	0.350467	1.76013e-12
SIVA1	0.349619	2.00611e-12
BTBD7	0.349118	2.1671e-12
HELLS	0.347473	2.78889e-12
PSME1	0.345472	3.78332e-12
DYNC1H1	0.345115	3.99374e-12
MCM4	0.344603	4.31615e-12
TIMM22	0.344429	4.43131e-12
HSP90AB1	0.344196	4.59023e-12
MAPK1IP1L	0.34405	4.69271e-12
PPP2R5C	0.344028	4.70825e-12
UCK2	0.343826	4.85426e-12
GSTZ1	0.343182	5.34926e-12
TRAPPC6B	0.34315	5.37481e-12
CCNB2	0.342742	5.71554e-12
TIMM9	0.34213	6.26603e-12
MFAP1	0.342075	6.31776e-12
ATXN3	0.341132	7.27566e-12
CHMP4A	0.340748	7.70541e-12
CACYBP	0.339547	9.21517e-12
JKAMP	0.339457	9.33968e-12
CDC20	0.338349	1.1007e-11
POMT2	0.338145	1.13443e-11
ECT2	0.337332	1.2793e-11
CCT2	0.336529	1.43991e-11
CHURC1	0.336382	1.47135e-11
PBK	0.335888	1.58191e-11
RCC1	0.335676	1.63208e-11
COPS3	0.335507	1.6729e-11
C1QBP	0.33525	1.73693e-11
ARHGAP11A	0.335009	1.79952e-11
MAX	0.334832	1.84647e-11
ATP6V1D	0.334568	1.91932e-11
WDR54	0.334276	2.00276e-11
PSME2	0.334202	2.02441e-11
MCM6	0.334125	2.04744e-11
C12ORF43	0.333145	2.3611e-11
HECTD1	0.33283	2.47182e-11
CHORDC1	0.332068	2.76037e-11
EXO1	0.331958	2.80457e-11
BUB1	0.331895	2.8301e-11
WARS	0.330016	3.71042e-11
ENO1	0.329072	4.24842e-11
MRPS28	0.32902	4.27976e-11
TEDC1	0.328246	4.78057e-11
NEK9	0.328185	4.82232e-11
EAPP	0.327814	5.08422e-11
DNAL1	0.327399	5.39355e-11
TPI1	0.326976	5.72812e-11
PTCD2	0.326865	5.81892e-11
CDCA2	0.32629	6.31323e-11
PSEN1	0.324689	7.91613e-11
RPL22L1	0.324614	8.00047e-11
HSPA4	0.324115	8.58171e-11
C8ORF37	0.323915	8.82662e-11
RPS29	0.323587	9.2422e-11
HMGB3	0.323424	9.45619e-11
AKT1	0.321826	1.18236e-10
NBN	0.320375	1.44665e-10
NCAPH	0.319321	1.6737e-10
COPS2	0.318493	1.87608e-10
PRPSAP2	0.318031	1.9992e-10
LLPH	0.317798	2.06435e-10
TUBA1B	0.317452	2.16473e-10
DPF1	0.317374	2.18789e-10
CCT3	0.317154	2.25488e-10
KIF18A	0.316709	2.39639e-10
XPO1	0.316556	2.44724e-10
TYMS	0.316428	2.49053e-10
SLC38A6	0.316371	2.50979e-10
SFPQ	0.315927	2.66664e-10
GTF2A2	0.314971	3.03727e-10
CLSPN	0.314565	3.20931e-10
OXA1L	0.314228	3.35956e-10
PSMA4	0.313714	3.6019e-10
SARNP	0.312295	4.36129e-10
TRAF3	0.311773	4.67862e-10
NCAPG	0.311237	5.02725e-10
CCNB1	0.310413	5.61304e-10
TRIP11	0.310212	5.76626e-10
SRPRB	0.309885	6.02336e-10
MRPL44	0.309806	6.08673e-10
SET	0.309711	6.1646e-10
MTA1	0.30959	6.26438e-10
BIRC5	0.309025	6.75366e-10
PINX1	0.307563	8.1978e-10
ZNF460	0.3074	8.37683e-10
MTHFD2	0.307139	8.66964e-10
GON7	0.30712	8.6921e-10
DHX9	0.306988	8.84422e-10
POLR3B	0.306918	8.92662e-10
RAD54B	0.306742	9.13543e-10
DAAM1	0.306384	9.57748e-10
RNGTT	0.306107	9.93266e-10
MCM10	0.306102	9.9388e-10
NXPH4	0.305839	1.02879e-09
DTL	0.305665	1.05266e-09
ANGEL1	0.305002	1.14816e-09
GSTCD	0.304926	1.15963e-09
CIP2A	0.304582	1.21305e-09
MRPL19	0.303777	1.34739e-09
DEPDC1	0.302041	1.68815e-09
MAP6D1	0.302011	1.69455e-09
KLHL28	0.301624	1.78157e-09
ZBTB25	0.301502	1.81e-09
DHRS4L2	0.3013	1.85786e-09
FRMD5	0.301269	1.86525e-09
SPATA5L1	0.301093	1.9081e-09
ARHGAP5	0.301092	1.90834e-09
DHRS4	0.300526	2.05276e-09
TM9SF1	0.29939	2.37511e-09
GINS4	0.299323	2.39555e-09
RABGGTA	0.299229	2.42442e-09
PDIA4	0.299092	2.46749e-09
NUSAP1	0.29838	2.70235e-09
NUP37	0.298256	2.74569e-09
G3BP1	0.29815	2.78281e-09
SOCS4	0.297884	2.87887e-09
COPS4	0.297758	2.92567e-09
COQ3	0.29718	3.14871e-09
CHD8	0.29716	3.15655e-09
TGS1	0.296955	3.24004e-09
GLMN	0.296848	3.28429e-09
MANF	0.296622	3.37979e-09
CCT4	0.296611	3.38442e-09
WRAP53	0.296511	3.42755e-09
GINS3	0.296091	3.61478e-09
MPI	0.296036	3.64004e-09
GEMIN4	0.295852	3.72603e-09
UNG	0.295848	3.72753e-09
ESCO2	0.295817	3.74258e-09
UBE3A	0.295805	3.7481e-09
BMS1	0.295512	3.8893e-09
H2AFZ	0.295292	3.99875e-09
SERBP1	0.295067	4.11376e-09
DDHD1	0.295039	4.12867e-09
MRM3	0.294873	4.21582e-09
EIF5A	0.294569	4.38035e-09
BUB1B	0.294327	4.51527e-09
PPAT	0.293903	4.76263e-09
KPNA2	0.293831	4.8058e-09
TERF1	0.293588	4.95454e-09
MRPS2	0.293154	5.23057e-09
RRM1	0.292826	5.45016e-09
KPNA4	0.292321	5.80446e-09
CCDC85C	0.292264	5.84592e-09
CHAF1B	0.292058	5.99767e-09
RACGAP1	0.291926	6.09745e-09
PPM1A	0.291863	6.14516e-09
CDC6	0.291725	6.25151e-09
SMC2	0.290799	7.01331e-09
HASPIN	0.28948	8.25564e-09
ABCD4	0.289437	8.29969e-09
GAPDH	0.289334	8.40631e-09
SLF1	0.289327	8.4127e-09
BRF1	0.289137	8.6123e-09
HACD3	0.288986	8.77441e-09
NIPSNAP1	0.288738	9.0459e-09
WDR41	0.288533	9.27623e-09
FXN	0.288487	9.3297e-09
CALR	0.28781	1.01371e-08
CCDC134	0.287617	1.03797e-08
SYNJ2BP	0.287106	1.10499e-08
ELAC2	0.287072	1.10956e-08
CCT7	0.287037	1.11424e-08
EIF4A3	0.286796	1.14762e-08
XRCC6	0.286625	1.17174e-08
MCM2	0.285958	1.27095e-08
PIGH	0.285694	1.31243e-08
ACIN1	0.285307	1.37545e-08
NOP56	0.285155	1.40104e-08
NAA15	0.285089	1.41236e-08
TCP1	0.284969	1.43313e-08
NUCKS1	0.284906	1.44399e-08
HPRT1	0.284212	1.57047e-08
KTN1	0.284047	1.60215e-08
AURKB	0.283973	1.61651e-08
NDC80	0.283922	1.6264e-08
RAD51	0.283586	1.69364e-08
PELP1	0.283309	1.7511e-08
CGRRF1	0.283049	1.80685e-08
AIF1L	0.282984	1.82107e-08
SEC23A	0.282672	1.89062e-08
PPIL1	0.282609	1.90495e-08
SPATA7	0.282206	1.99922e-08
HIST1H2BL	0.281987	2.05242e-08
PRIM1	0.281943	2.06326e-08
HNRNPU	0.281904	2.07297e-08
BRI3BP	0.28158	2.15494e-08
YWHAE	0.281549	2.16288e-08
ATAD2	0.281278	2.23406e-08
PIGF	0.281247	2.24238e-08
PWP1	0.281144	2.27019e-08
HNRNPR	0.281116	2.27762e-08
IMMT	0.28078	2.37071e-08
MND1	0.280753	2.37849e-08
LYAR	0.280014	2.59719e-08
ADNP2	0.279954	2.61561e-08
OSGEP	0.279651	2.71128e-08
CYB5D1	0.279559	2.74114e-08
GRSF1	0.278697	3.0358e-08
TUBGCP4	0.278379	3.15207e-08
TNNT1	0.278245	3.20218e-08
PDIA3	0.277976	3.30521e-08
FAM98B	0.277886	3.34081e-08
MMACHC	0.277864	3.34912e-08
DCLRE1B	0.277828	3.36346e-08
B3GNT4	0.277765	3.38875e-08
CCNA2	0.277309	3.57545e-08
SFXN1	0.27726	3.59602e-08
ZNF232	0.277177	3.63137e-08
EXOSC2	0.277138	3.64804e-08
TUBB	0.277028	3.69518e-08
CAND1	0.277021	3.6985e-08
CDC42BPB	0.276744	3.82063e-08
STIP1	0.27665	3.86299e-08
OR2B3	0.276639	3.86797e-08
EGLN3	0.276437	3.96062e-08
MTFR1	0.275678	4.32835e-08
PPID	0.275395	4.47382e-08
PGM2	0.274921	4.72776e-08
KIF23	0.274682	4.86126e-08
MRPL42	0.274575	4.92196e-08
DSCC1	0.274444	4.99766e-08
IL27RA	0.274321	5.06949e-08
POLR2D	0.273824	5.37045e-08
MAD2L1	0.273685	5.45771e-08
ANP32B	0.273552	5.54219e-08
GTF3C6	0.273467	5.59689e-08
HNRNPK	0.273309	5.69994e-08
MIS12	0.273185	5.7827e-08
MREG	0.273064	5.86425e-08
DMAC2L	0.27296	5.93462e-08
MESD	0.272839	6.01869e-08
TIMELESS	0.272673	6.13468e-08
UTP11	0.272578	6.20261e-08
PGAM1	0.272535	6.23365e-08
CCAR1	0.272518	6.24563e-08
MPHOSPH9	0.272437	6.30407e-08
DNAJA4	0.272342	6.37367e-08
RFC5	0.272121	6.53778e-08
SNRNP40	0.271896	6.70898e-08
CKS2	0.271785	6.7954e-08
VRK2	0.271738	6.83247e-08
GMPR2	0.271711	6.8537e-08
HAUS2	0.27152	7.00581e-08
DEPDC1B	0.271436	7.07355e-08
ZNF326	0.271302	7.18329e-08
SLC9A7	0.271254	7.2232e-08
PDE12	0.271075	7.37298e-08
NAA50	0.271066	7.37995e-08
DMKN	0.271018	7.42063e-08
CKS1B	0.270962	7.46858e-08
ITPK1	0.270897	7.52478e-08
RPS6KA5	0.270798	7.61073e-08
PLK4	0.270767	7.63707e-08
PA2G4	0.270397	7.96745e-08
PRIM2	0.270365	7.99701e-08
SIPA1L1	0.2698	8.52964e-08
FECH	0.269697	8.63084e-08
CDC45	0.26952	8.80618e-08
SEH1L	0.26935	8.97841e-08
METTL3	0.269129	9.20726e-08
SGCB	0.268989	9.35457e-08
NUP35	0.268571	9.80992e-08
PSMD12	0.268508	9.88025e-08
EIF4E	0.268453	9.9417e-08
MRPL46	0.268382	1.00226e-07
TRIAP1	0.268347	1.00622e-07
CTNNAL1	0.268271	1.01488e-07
SORD	0.268178	1.02572e-07
CLBA1	0.26812	1.03247e-07
GMNN	0.268026	1.04347e-07
ATP5F1B	0.267861	1.06312e-07
LRRC40	0.267059	1.16404e-07
CDC7	0.267046	1.1657e-07
ZNF839	0.266992	1.17286e-07
HIST2H2AC	0.266895	1.18576e-07
ZNF770	0.26688	1.18773e-07
RUVBL2	0.266817	1.19612e-07
TMTC3	0.266703	1.21167e-07
LGMN	0.266435	1.24877e-07
PAX9	0.266262	1.27323e-07
TC2N	0.265598	1.37175e-07
TMEM64	0.265307	1.41723e-07
PSMC3IP	0.265102	1.45017e-07
WDR76	0.264963	1.47291e-07
HMBOX1	0.264636	1.52774e-07
GFM2	0.264502	1.55082e-07
HIF1A	0.264467	1.55676e-07
PPP2R3C	0.264267	1.59188e-07
NCL	0.264166	1.61002e-07
GTF2H3	0.264108	1.62035e-07
DUSP4	0.263339	1.76519e-07
BCAT2	0.263259	1.78098e-07
ZNF484	0.263184	1.7957e-07
CDC73	0.263115	1.80962e-07
ARG2	0.262587	1.91867e-07
GCH1	0.262516	1.93378e-07
OIP5	0.262402	1.95841e-07
SMC4	0.262276	1.98585e-07
NEIL2	0.261999	2.04751e-07
MTHFS	0.261993	2.04898e-07
TINF2	0.261857	2.08002e-07
NEDD1	0.261765	2.10111e-07
RPF1	0.261511	2.16098e-07
CEP76	0.261136	2.25196e-07
CCDC88C	0.260993	2.28784e-07
CCL26	0.260811	2.334e-07
DNAAF4	0.260392	2.44388e-07
SHCBP1	0.260358	2.453e-07
TSFM	0.260104	2.52239e-07
PPIB	0.260053	2.53647e-07
SAV1	0.259407	2.72219e-07
THAP1	0.259291	2.75686e-07
KPNB1	0.259212	2.78072e-07
PHF23	0.259125	2.80732e-07
NDUFB1	0.258952	2.86074e-07
SF3A3	0.258872	2.88585e-07
ELP3	0.258817	2.90319e-07
TAF3	0.258506	3.00325e-07
C3ORF33	0.258418	3.03228e-07
HPF1	0.258388	3.0423e-07
NPM1	0.258182	3.11117e-07
ZFYVE21	0.258087	3.14336e-07
KPTN	0.257877	3.21608e-07
FAM133B	0.257743	3.263e-07
POLE3	0.257098	3.49955e-07
GTF3C4	0.256824	3.60457e-07
ACTN1	0.256783	3.62052e-07
DDX47	0.256468	3.74604e-07
AMD1	0.256174	3.86653e-07
HSPE1	0.256087	3.90306e-07
RRM2	0.25591	3.97818e-07
PAK6	0.255893	3.98559e-07
PCLAF	0.255887	3.98806e-07
ATXN10	0.255497	4.15925e-07
CRIP1	0.255356	4.22263e-07
TIMM17A	0.255272	4.26094e-07
USP14	0.255259	4.26686e-07
GRWD1	0.255097	4.34161e-07
INTS10	0.254941	4.41494e-07
MLH3	0.254665	4.54734e-07
SEL1L	0.25426	4.74929e-07
UMPS	0.254001	4.88252e-07
ARPP19	0.253829	4.9731e-07
ABHD10	0.253659	5.064e-07
PCSK9	0.25333	5.2449e-07
BCAS2	0.253292	5.26606e-07
MRPS5	0.25328	5.27257e-07
PLRG1	0.253273	5.27648e-07
GNAI3	0.253174	5.33251e-07
RTTN	0.253098	5.37588e-07
CHRNA5	0.253058	5.39865e-07
CLUAP1	0.252482	5.73967e-07
GPN3	0.252442	5.76387e-07
PSMD1	0.252264	5.874e-07
UBE2V2	0.251806	6.16593e-07
KDM1A	0.251179	6.58885e-07
PGAM4	0.251021	6.69974e-07
FANCI	0.250977	6.73048e-07
DUT	0.250645	6.97032e-07
DENR	0.250521	7.06184e-07
NOC3L	0.250402	7.15074e-07
PRMT1	0.250304	7.22486e-07
SSX2IP	0.250288	7.23743e-07
NOLC1	0.250214	7.29411e-07
HIST1H3J	0.250074	7.40161e-07
LMNB1	0.250057	7.4149e-07
THRAP3	0.250029	7.43726e-07
AQR	0.249944	7.50374e-07
PPP1CC	0.249879	7.55511e-07
COMMD1	0.249877	7.55657e-07
DCAF4	0.249702	7.69655e-07
NASP	0.249638	7.74875e-07
PHAX	0.249588	7.78957e-07
HEATR5A	0.249316	8.01464e-07
ETFA	0.249291	8.03541e-07
ERI1	0.249188	8.12258e-07
NUP88	0.249169	8.13923e-07
ASPH	0.248726	8.52469e-07
SPATA5	0.2486	8.63801e-07
GRPEL1	0.248437	8.78582e-07
ATP5F1A	0.248012	9.18377e-07
HOMEZ	0.247779	9.41002e-07
AP1S3	0.2474	9.7874e-07
RUVBL1	0.247299	9.89109e-07
LTA4H	0.247236	9.95569e-07
ZNF165	0.247065	1.01345e-06
CRYZ	0.246897	1.03127e-06
MATR3	0.246649	1.05807e-06
RBBP8	0.246352	1.09111e-06
YLPM1	0.246337	1.09274e-06
CRK	0.246188	1.10973e-06
IMPDH2	0.246178	1.11094e-06
TACC3	0.246164	1.11256e-06
FRRS1	0.245522	1.18871e-06
IMP4	0.245481	1.1938e-06
BAG4	0.245207	1.22793e-06
EXOSC9	0.245048	1.24821e-06
RFX7	0.244863	1.27208e-06
SDCBP	0.244609	1.30571e-06
THOC1	0.244575	1.31028e-06
WDR3	0.244535	1.31577e-06
RPRD1A	0.244469	1.3246e-06
PHB2	0.244388	1.33566e-06
ZRANB3	0.244309	1.34656e-06
ALOXE3	0.243969	1.39424e-06
VDAC3	0.243941	1.39832e-06
FAIM	0.243823	1.41535e-06
PNPLA3	0.243799	1.41872e-06
FOXL2NB	0.243688	1.435e-06
RANGAP1	0.243585	1.45013e-06
ARMC1	0.243219	1.50545e-06
NUDT9	0.243128	1.51949e-06
TTK	0.243024	1.53556e-06
SERPINB2	0.243004	1.53869e-06
ENO2	0.242715	1.58481e-06
SHMT2	0.242606	1.60238e-06
SKP2	0.242259	1.65994e-06
FAM49B	0.242258	1.66016e-06
PPP1R13B	0.241991	1.70575e-06
MDP1	0.241826	1.73458e-06
PAICS	0.241168	1.85418e-06
ACTR6	0.241146	1.85822e-06
PLA2G3	0.241125	1.86213e-06
ME2	0.240853	1.91415e-06
MORC4	0.240505	1.98248e-06
TXNL4A	0.240468	1.98986e-06
COQ2	0.240392	2.00523e-06
GTPBP8	0.239302	2.23742e-06
WBP11	0.239059	2.29276e-06
PPA2	0.238959	2.31572e-06
PSMD11	0.238911	2.32696e-06
NDUFA4L2	0.238817	2.34884e-06
ZNF286A	0.238788	2.35578e-06
PCNX1	0.23861	2.39814e-06
RCOR2	0.2385	2.42465e-06
NEIL3	0.238498	2.42512e-06
ADAM9	0.238089	2.52631e-06
KNL1	0.238076	2.52951e-06
PIAS2	0.237946	2.56264e-06
RFC4	0.237945	2.56281e-06
CDC27	0.237639	2.64217e-06
TDG	0.237436	2.69597e-06
ARC	0.237398	2.70624e-06
WDR43	0.237247	2.74715e-06
HNRNPA3P1	0.237125	2.78074e-06
PRPS1	0.237024	2.80868e-06
NEK2	0.236992	2.81763e-06
NT5DC2	0.236455	2.97177e-06
SRP72	0.23643	2.97916e-06
OTUB2	0.236288	3.0216e-06
YARS2	0.236218	3.04246e-06
RPL4	0.236083	3.0835e-06
DHX15	0.236045	3.09485e-06
GABPB1	0.235995	3.1103e-06
NDUFV2	0.235959	3.12147e-06
ENY2	0.235827	3.16237e-06
BEND3	0.235757	3.18447e-06
HIST1H2AJ	0.235467	3.27682e-06
NAA25	0.23503	3.42116e-06
UBXN2B	0.234944	3.45027e-06
MCM5	0.234756	3.51449e-06
PPP2R2A	0.234697	3.53478e-06
AK7	0.234376	3.64821e-06
SYNCRIP	0.234357	3.65491e-06
ALG10	0.234064	3.76148e-06
C19ORF48	0.233919	3.81552e-06
BLOC1S2	0.233891	3.82574e-06
MAP4K5	0.233838	3.84585e-06
RAB2B	0.233761	3.87492e-06
ULBP2	0.233652	3.91656e-06
FANCB	0.233465	3.98863e-06
HSPA6	0.233317	4.04675e-06
NMD3	0.233298	4.05442e-06
FEN1	0.23316	4.10936e-06
CENPE	0.232558	4.35806e-06
BZW1	0.2323	4.46876e-06
RBMXL1	0.232264	4.48424e-06
C9ORF116	0.232095	4.55881e-06
AGL	0.232031	4.58707e-06
PARP1	0.231493	4.83294e-06
FZD3	0.231488	4.83506e-06
TNPO1	0.231371	4.89044e-06
TM7SF3	0.231255	4.94543e-06
FUBP1	0.230933	5.10196e-06
MRPL18	0.230897	5.12002e-06
RPAP3	0.230637	5.25019e-06
GPR3	0.230544	5.29771e-06
BBS7	0.230486	5.32705e-06
MRPL30	0.230459	5.34106e-06
UHRF1	0.23042	5.36152e-06
WNT7B	0.230361	5.39209e-06
ZNF618	0.230251	5.44931e-06
IGFL2	0.230154	5.50048e-06
NUP188	0.229893	5.64027e-06
CPOX	0.229743	5.72242e-06
RIPK2	0.22949	5.86356e-06
PNMA1	0.229439	5.89212e-06
SUMO3	0.229106	6.08333e-06
CAPRIN1	0.229007	6.14131e-06
ING2	0.228936	6.18319e-06
RIOK1	0.22892	6.19287e-06
PYGL	0.2289	6.20459e-06
SHPK	0.228857	6.23049e-06
PTPN2	0.228633	6.36552e-06
UGDH	0.228606	6.38194e-06
BAG2	0.228603	6.38374e-06
SLBP	0.228251	6.60203e-06
KCNRG	0.227935	6.80423e-06
SASS6	0.227687	6.96692e-06
DICER1	0.227644	6.99554e-06
MEX3C	0.227598	7.02671e-06
NAF1	0.227467	7.11458e-06
EIF3J	0.227338	7.20221e-06
UCHL5	0.227047	7.40449e-06
TMEM30B	0.227011	7.4296e-06
EBNA1BP2	0.22696	7.46593e-06
NEUROG3	0.226717	7.64028e-06
DNAJB1	0.226712	7.6436e-06
HMMR	0.226608	7.7195e-06
FTSJ3	0.226586	7.73559e-06
PRDX1	0.226533	7.77497e-06
DNAJB4	0.226501	7.79832e-06
ABCE1	0.226481	7.81315e-06
RANBP1	0.226373	7.89323e-06
IARS	0.226315	7.93664e-06
PTMA	0.22628	7.96317e-06
MRPS22	0.226153	8.05972e-06
MCM3	0.22608	8.11579e-06
GAN	0.225602	8.49045e-06
CCT5	0.225402	8.65183e-06
FAM72B	0.225401	8.65314e-06
CENPA	0.225389	8.66256e-06
PLK2	0.225354	8.69161e-06
USP5	0.225195	8.82228e-06
CDCA5	0.225099	8.90248e-06
TRMT61A	0.225063	8.93316e-06
PKNOX1	0.225059	8.93588e-06
SKA1	0.224974	9.00801e-06
KRT16	0.224887	9.08229e-06
TEX9	0.224831	9.13002e-06
LARP4	0.224808	9.15013e-06
ALDH6A1	0.224688	9.25401e-06
FAM72D	0.224483	9.43342e-06
TMED2	0.224436	9.47559e-06
DDX20	0.224095	9.78305e-06
GPI	0.224072	9.8042e-06
TOP3A	0.223988	9.88222e-06
SNRPE	0.223866	9.9953e-06
THTPA	0.223829	1.00301e-05
RAD54L	0.223826	1.0033e-05
WDR75	0.223425	1.04162e-05
COMMD10	0.22338	1.04603e-05
CLPX	0.223039	1.07988e-05
CTDSPL2	0.222828	1.10132e-05
MORF4L1	0.222778	1.10646e-05
OR1F1	0.222775	1.10677e-05
RTF1	0.222719	1.1126e-05
RNF31	0.222463	1.13947e-05
PITX3	0.222312	1.1555e-05
ZWINT	0.222295	1.15734e-05
SNRNP25	0.222272	1.1598e-05
MBIP	0.222234	1.16397e-05
ATL3	0.222066	1.18224e-05
TUBGCP5	0.221812	1.2105e-05
ELOVL6	0.221748	1.21768e-05
KIF20A	0.221738	1.21883e-05
AP3M2	0.221693	1.22395e-05
MTFMT	0.221663	1.22728e-05
TRIM16	0.221464	1.25012e-05
LPCAT1	0.221233	1.27717e-05
SSB	0.221071	1.29641e-05
MRPL15	0.220916	1.31517e-05
POLR3K	0.220778	1.33204e-05
C4ORF3	0.22031	1.39078e-05
SELENOI	0.220224	1.40186e-05
RNASEH1	0.220096	1.41848e-05
SPAG5	0.220009	1.4299e-05
MRPL3	0.219994	1.43184e-05
FAM81A	0.219987	1.43281e-05
BNIP3L	0.219978	1.43391e-05
KLC3	0.219947	1.43801e-05
POLR1C	0.219907	1.44334e-05
SOCS6	0.219878	1.44722e-05
NDUFAF1	0.219632	1.48029e-05
ADSSL1	0.219608	1.48352e-05
NDUFA9	0.219461	1.50365e-05
ABCG5	0.219207	1.53917e-05
TSTA3	0.219198	1.54035e-05
BEGAIN	0.219164	1.54526e-05
CA9	0.21904	1.56288e-05
COQ5	0.218968	1.57315e-05
NMB	0.218956	1.57491e-05
SNRPF	0.218805	1.5969e-05
FUT10	0.218805	1.59691e-05
UBA6	0.218719	1.60942e-05
ANXA1	0.218408	1.65589e-05
KCTD1	0.218408	1.65591e-05
NFXL1	0.218333	1.66732e-05
KRTAP11.1	0.218308	1.671e-05
HEXIM1	0.218266	1.67755e-05
NME7	0.218123	1.69948e-05
STARD7	0.217984	1.7212e-05
KIF2C	0.217961	1.72475e-05
TMOD3	0.217908	1.7331e-05
PLK1	0.217847	1.74279e-05
E2F7	0.217691	1.76773e-05
AGPAT5	0.217655	1.7735e-05
PCNA	0.217599	1.78264e-05
FOXM1	0.217309	1.8302e-05
RPN1	0.217192	1.84974e-05
PRPF39	0.217132	1.85991e-05
LGALS7B	0.217104	1.86457e-05
PDIA6	0.217036	1.8761e-05
TAF1A	0.21697	1.88738e-05
VAPA	0.216783	1.9197e-05
HIST1H3D	0.216634	1.94585e-05
CSKMT	0.216579	1.95548e-05
DDX18	0.216441	1.98013e-05
TCEA1	0.216399	1.98769e-05
LDHA	0.216384	1.99042e-05
AGR2	0.216311	2.00354e-05
PDK3	0.216292	2.00689e-05
BOLA3	0.216229	2.01837e-05
TACO1	0.216098	2.04248e-05
RPL7L1	0.215922	2.07518e-05
NOL11	0.215835	2.09147e-05
CHD4	0.215823	2.09385e-05
SLC28A3	0.215742	2.10912e-05
NUP54	0.215734	2.11062e-05
PNN	0.215645	2.12773e-05
ARNTL2	0.215594	2.13755e-05
LYN	0.215551	2.14583e-05
LDHB	0.21549	2.15772e-05
MCM7	0.215485	2.1587e-05
HELB	0.215393	2.17658e-05
INTS7	0.21537	2.18106e-05
ANLN	0.215169	2.22085e-05
EME1	0.214818	2.29212e-05
SLC25A3	0.214797	2.29648e-05
C2ORF49	0.214722	2.31184e-05
SLC25A11	0.214689	2.3187e-05
ZBTB8A	0.21455	2.34796e-05
RPF2	0.214463	2.3662e-05
FBXO22	0.214445	2.37003e-05
WDR12	0.21437	2.38607e-05
SPAG7	0.213959	2.47549e-05
PGAM5	0.213819	2.5067e-05
PGK1	0.213635	2.54832e-05
SOD1	0.213492	2.58108e-05
ARMC8	0.213428	2.59579e-05
USP1	0.2134	2.6024e-05
RAD23B	0.213341	2.61605e-05
PUF60	0.213335	2.6175e-05
PSMD9	0.213303	2.6248e-05
DDX55	0.213237	2.64035e-05
CCDC127	0.213139	2.66352e-05
FABP5	0.213107	2.67118e-05
GSR	0.212901	2.72055e-05
ALOX12B	0.212872	2.72774e-05
FKBPL	0.212592	2.79643e-05
NUDCD1	0.212059	2.93187e-05
API5	0.211866	2.98238e-05
SSR3	0.211765	3.00921e-05
RELCH	0.21169	3.02936e-05
METAP1	0.211515	3.07668e-05
TRNT1	0.211369	3.11657e-05
STIL	0.211251	3.14918e-05
SERPINB1	0.211226	3.15624e-05
TM2D2	0.211183	3.16817e-05
STXBP4	0.211036	3.20956e-05
NOP10	0.211032	3.21078e-05
ATP6V1B2	0.211021	3.21383e-05
HAUS8	0.210855	3.2611e-05
THOC6	0.210765	3.28711e-05
RAD21	0.210661	3.31747e-05
PGGT1B	0.210631	3.32608e-05
WASF1	0.210596	3.33652e-05
SMAD4	0.210577	3.34214e-05
ERCC2	0.210408	3.39219e-05
RAD51AP1	0.210407	3.39229e-05
MRPL35	0.210266	3.43465e-05
CCDC58	0.210216	3.44998e-05
PFN1	0.209814	3.57374e-05
DBR1	0.209654	3.62414e-05
DCP1A	0.209637	3.62957e-05
GMEB1	0.209561	3.65408e-05
NUF2	0.209537	3.66156e-05
MRPS11	0.209482	3.67938e-05
MRPS30	0.209227	3.76246e-05
UBXN8	0.209133	3.79342e-05
CYC1	0.209063	3.81682e-05
POLR3D	0.209028	3.82825e-05
CENPI	0.208775	3.91396e-05
TEX10	0.208639	3.96073e-05
CHEK1	0.208328	4.06931e-05
TXNDC17	0.208243	4.09958e-05
DR1	0.208173	4.12493e-05
IFI27L1	0.208152	4.13215e-05
CDR2L	0.208105	4.14936e-05
HAT1	0.207936	4.21078e-05
IPO11	0.207898	4.22466e-05
MRPS7	0.207797	4.26179e-05
PAEP	0.207678	4.3062e-05
NSL1	0.207636	4.32189e-05
MCPH1	0.207395	4.41312e-05
TRIM7	0.207378	4.41971e-05
N4BP2	0.207196	4.48991e-05
CISD2	0.207158	4.50466e-05
MTBP	0.207066	4.54095e-05
PSAPL1	0.207059	4.54359e-05
RAET1K	0.207002	4.5658e-05
EIF2AK2	0.206994	4.56915e-05
UBE2W	0.206983	4.57363e-05
UBE2T	0.206937	4.5917e-05
RSRC2	0.206921	4.59816e-05
FZD2	0.206658	4.70377e-05
ABHD14A	0.20657	4.73983e-05
PSMA5	0.206522	4.75958e-05
CCNB1IP1	0.206514	4.76283e-05
GAR1	0.206459	4.78533e-05
STOML2	0.206387	4.81518e-05
KRT6A	0.206308	4.84829e-05
GEMIN5	0.206261	4.86785e-05
ZBTB11	0.206196	4.89521e-05
FGF23	0.206161	4.91006e-05
BTBD1	0.205993	4.98167e-05
EPOP	0.20599	4.98292e-05
SMURF2	0.205856	5.04053e-05
SUZ12	0.205813	5.05942e-05
TTC4	0.20581	5.06082e-05
TRPV6	0.205671	5.12175e-05
NCBP3	0.205647	5.13217e-05
KIF11	0.205543	5.1781e-05
MRPL16	0.205436	5.22611e-05
ATPAF2	0.205388	5.24788e-05
XPO7	0.205168	5.34775e-05
RSL24D1	0.205081	5.38771e-05
MFSD2B	0.205042	5.40564e-05
YEATS4	0.20499	5.43e-05
MRPL1	0.204811	5.51365e-05
CDCA8	0.204764	5.53595e-05
HMGB2	0.204754	5.5409e-05
PAWR	0.20459	5.61921e-05
UBE2S	0.204585	5.62155e-05
PSAT1	0.204584	5.6219e-05
SNRPA1	0.204553	5.63696e-05
NIN	0.204495	5.6648e-05
IVD	0.204453	5.68551e-05
MRPL47	0.2044	5.71103e-05
PABPN1	0.204268	5.77593e-05
PTGR2	0.204119	5.85006e-05
PPT1	0.204092	5.86352e-05
MED31	0.204041	5.88882e-05
CSNK1G1	0.203814	6.00392e-05
HSP90B3P	0.203676	6.07503e-05
PLOD1	0.203635	6.09617e-05
TMPO	0.203599	6.11502e-05
PSMB6	0.203593	6.11821e-05
RBM14	0.203462	6.18665e-05
DBN1	0.203381	6.22963e-05
OCIAD1	0.203374	6.23309e-05
S100A3	0.203352	6.24513e-05
SAAL1	0.203307	6.2688e-05
ESCO1	0.203291	6.2774e-05
IKBIP	0.203203	6.32478e-05
MRPL17	0.203196	6.3282e-05
WBP11P1	0.203106	6.37679e-05
NUCB2	0.203054	6.40512e-05
DCUN1D5	0.202925	6.47539e-05
PPP1R12A	0.202769	6.56172e-05
CCDC59	0.202563	6.67724e-05
TIFA	0.202531	6.69541e-05
GTPBP4	0.202489	6.71965e-05
SERPINH1	0.202484	6.72224e-05
MIA2.1	0.202451	6.74122e-05
MDH1	0.202282	6.83794e-05
CENPL	0.20221	6.88001e-05
TEDC2	0.20209	6.95006e-05
CEP135	0.202018	6.99241e-05
EFTUD2	0.201951	7.03238e-05
ODC1	0.201877	7.07651e-05
SMCHD1	0.201804	7.12013e-05
EARS2	0.201686	7.19134e-05
ATP8B3	0.201664	7.2047e-05
ARHGAP11B	0.201599	7.24405e-05
PTMS	0.201536	7.28306e-05
EIF5B	0.201528	7.28788e-05
RBPJ	0.20148	7.31745e-05
ALKBH5	0.201414	7.35786e-05
BLM	0.201144	7.527e-05
CDH24	0.20107	7.57397e-05
CCDC25	0.20106	7.58077e-05
HIST1H2AM	0.201023	7.60392e-05
FBXO5	0.200962	7.6432e-05
ABCA12	0.200842	7.72068e-05
HSPA9	0.200803	7.74601e-05
NOCT	0.20077	7.76781e-05
GINS1	0.200735	7.7903e-05
LCLAT1	0.200662	7.83822e-05
CKAP2L	0.200592	7.88475e-05
NSMAF	0.200569	7.89997e-05
C10ORF12	0.200508	7.94002e-05
GBE1	0.200444	7.98321e-05
OSTC	0.200337	8.05483e-05
GRPEL2	0.200299	8.08057e-05
SNRPD3	0.200253	8.11181e-05
TRIM16L	0.200244	8.11812e-05
DARS2	0.200236	8.12344e-05
GART	0.200208	8.14262e-05
USP8	0.200107	8.21171e-05
SGPP1	0.200098	8.21769e-05
PPP2CA	0.200013	8.27625e-05
PRC1	0.199896	8.35747e-05
VEZT	0.199722	8.48025e-05
LIAS	0.199674	8.51419e-05
UBE2D3	0.199555	8.59907e-05
NARS	0.199468	8.66185e-05
ULBP3	0.198856	9.11531e-05
POP5	0.198813	9.14783e-05
DCAF5	0.198758	9.18982e-05
GALK2	0.198667	9.25951e-05
ZSCAN5A	0.19858	9.32631e-05
SBNO1	0.198345	9.51018e-05
POLA2	0.198203	9.62322e-05
DIPK1C	0.198046	9.74896e-05
CDK1	0.197999	9.78753e-05
PA2G4P4	0.19798	9.80247e-05
MRPS9	0.197955	9.82298e-05
RPL26	0.197846	9.91185e-05
MPDU1	0.197712	0.000100225
TOR1AIP2	0.197616	0.000101027
BLMH	0.197614	0.00010104
GTF2E2	0.197556	0.000101529
ZSCAN12P1	0.197518	0.000101849
FBXO16	0.197495	0.000102034
MRPL50	0.197477	0.000102188
MTRF1L	0.197456	0.000102371
VSIG10L	0.197406	0.000102788
ATP2C1	0.197272	0.000103933
NOP58	0.197106	0.000105365
TM4SF4	0.197069	0.000105692
PSMD2	0.197016	0.00010615
KLHL25	0.197003	0.000106271
COMMD8	0.196775	0.000108278
RRAS2	0.196772	0.000108308
TOP2A	0.196688	0.00010906
GPRIN1	0.196565	0.000110166
POLR1B	0.196506	0.000110707
IRF8	0.196469	0.000111042
GINS2	0.196334	0.00011228
ITGAE	0.196329	0.000112331
GOLT1B	0.196225	0.000113289
HMGA1	0.196031	0.000115106
TRAP1	0.195943	0.000115941
TTC7B	0.195813	0.000117189
MTIF2	0.195747	0.000117817
MELK	0.195719	0.000118094
NUDT6	0.195358	0.000121634
HBS1L	0.195351	0.000121705
OXCT1	0.195313	0.000122076
NDUFB9	0.195287	0.000122343
IMPACT	0.195285	0.000122364
CENPN	0.195222	0.000122988
ARSK	0.195169	0.000123529
SNX22	0.195151	0.000123709
AGPS	0.195033	0.000124905
CEP55	0.194983	0.000125413
FAM102B	0.194963	0.000125623
ZNF695	0.194899	0.000126275
S100A16	0.194819	0.000127101
MTDH	0.194549	0.000129927
CDC42EP1	0.194532	0.00013011
IER3IP1	0.194435	0.000131145
AEBP2	0.194342	0.000132142
WNT8B	0.194322	0.000132351
KISS1R	0.194072	0.000135075
USP3	0.19405	0.000135311
TTC26	0.193972	0.00013617
RARS	0.193967	0.000136226
LGALS7	0.193902	0.000136952
ATAD5	0.1939	0.000136965
FSCN1	0.1938	0.000138091
RGS10	0.193744	0.000138711
WDYHV1	0.193625	0.000140063
SSRP1	0.193377	0.000142901
LRP8	0.192926	0.000148209
CD109	0.192744	0.000150407
CPSF6	0.192611	0.000152029
SENP3	0.192555	0.000152714
ZNF143	0.192494	0.000153461
RAD51C	0.192409	0.000154522
NOL9	0.192282	0.000156105
YWHAQ	0.19225	0.000156511
POLR2A	0.191829	0.000161905
AFG3L2	0.191783	0.000162504
RPAIN	0.191671	0.000163968
PDHX	0.191446	0.000166953
FGF11	0.191401	0.000167563
TYRO3	0.191277	0.000169229
IGSF9B	0.190891	0.000174537
RPE	0.190857	0.00017502
KIF22	0.190773	0.00017619
KIF4A	0.190646	0.000177987
NLE1	0.190417	0.000181273
R3HDM1	0.190264	0.000183499
MRPL13	0.190259	0.000183575
ASTN2	0.190232	0.000183966
MED28	0.190186	0.000184645
RPL8	0.190117	0.000185665
TPPP	0.189893	0.000188993
TMEM132A	0.189851	0.000189633
ADSL	0.189696	0.000191982
CLEC5A	0.189679	0.000192247
MAK16	0.189664	0.000192474
CENPO	0.189407	0.000196437
BRIP1	0.189351	0.000197318
MAP7D3	0.189234	0.000199156
CCNE2	0.189098	0.00020131
TRIM32	0.189027	0.000202449
OR10K1	0.188857	0.00020519
SMU1	0.188829	0.000205649
TMSB10	0.188799	0.00020613
ZNF267	0.188736	0.000207156
SAP30	0.188633	0.000208863
CA8	0.188616	0.00020914
NSUN4	0.188512	0.000210854
SF3B3	0.188291	0.000214567
TRIP13	0.188219	0.000215797
DNAJC8	0.188216	0.000215847
PTTG1	0.188119	0.000217505
KHDRBS1	0.188101	0.000217808
PRTN3	0.188077	0.000218228
PIMREG	0.187963	0.000220185
EXOSC4	0.187833	0.000222451
NUS1	0.187768	0.000223594
DYNLL1	0.187695	0.000224885
TARBP2	0.187288	0.000232189
TBC1D19	0.187166	0.00023442
CHTF8	0.18714	0.000234913
LMAN1	0.186905	0.000239277
PIP4P1	0.186899	0.000239382
UQCRFS1	0.186791	0.000241423
ARL6IP1	0.18677	0.000241816
MDM2	0.186608	0.000244904
KLHL18	0.186558	0.00024586
MRPL28	0.186452	0.000247911
ZNF114	0.18643	0.000248325
ALG6	0.186396	0.000248994
CDK2	0.186266	0.000251545
TUBA1C	0.186081	0.000255201
EDARADD	0.186004	0.000256737
ANXA2	0.185911	0.000258595
SMARCA5	0.185853	0.000259763
PFAS	0.185843	0.000259976
HAUS6	0.185793	0.000260985
TRIML2	0.185715	0.000262585
WDCP	0.185661	0.000263688
AAAS	0.185641	0.00026409
PUM3	0.185627	0.00026439
LYSMD2	0.185578	0.000265397
SPTY2D1	0.185572	0.000265519
HPSE	0.185474	0.000267545
SRP19	0.185454	0.000267969
POC1A	0.185262	0.000271996
FGFBP1	0.185169	0.00027397
PFKP	0.185083	0.000275794
NUP205	0.185011	0.000277354
ETF1	0.185008	0.000277415
NCBP1	0.18498	0.000278014
MAPK12	0.184962	0.000278401
S100A14	0.184946	0.000278753
KRT85	0.184891	0.000279936
TRNP1	0.184772	0.000282541
RPAP2	0.184554	0.000287336
ERGIC2	0.184525	0.000287985
MRPL39	0.184504	0.000288459
STXBP6	0.184503	0.000288475
PPIG	0.184034	0.00029912
AFG1L	0.184031	0.000299196
FDXR	0.183988	0.000300186
CREB1	0.183961	0.000300807
PRDX3	0.1838	0.00030457
PSIP1	0.183704	0.000306827
SNUPN	0.183703	0.000306849
TARDBP	0.183666	0.000307747
C4ORF46	0.183602	0.000309263
NAA38	0.183595	0.000309431
NAA38.1	0.183595	0.000309431
MRPL33	0.183577	0.000309852
MRTO4	0.183568	0.000310065
PACS2	0.183515	0.000311324
BAG3	0.183441	0.000313115
FANCD2	0.183353	0.000315228
MAOB	0.183246	0.000317856
CALB1	0.183176	0.000319569
RPL5	0.183125	0.000320816
NUP50	0.183121	0.000320904
DIS3L	0.183097	0.000321504
TMEM70	0.183018	0.000323463
KSR2	0.183006	0.000323767
RPL41	0.182807	0.000328752
HMGN2	0.1828	0.000328917
KITLG	0.182715	0.000331076
RNF145	0.182584	0.000334419
CDK2AP1	0.182577	0.000334587
PCSK5	0.182543	0.000335461
PDS5A	0.182428	0.000338435
TFAM	0.182262	0.000342742
TLE6	0.18216	0.000345427
YES1	0.18208	0.000347552
MORF4	0.182059	0.000348109
MRPL51	0.181968	0.000350552
ABCG8	0.181867	0.000353244
RPL7	0.181815	0.000354655
DNTTIP2	0.181733	0.000356876
ELOVL3	0.181711	0.000357477
SDR39U1	0.181669	0.000358621
ZNF534	0.181524	0.000362613
HNRNPM	0.181474	0.000363986
TECPR2	0.181437	0.000365024
SGO1	0.181329	0.000368041
TTL	0.181239	0.000370558
MRPS23	0.181164	0.000372677
MRFAP1	0.181099	0.000374522
GIN1	0.181074	0.000375253
SPRR1A	0.180995	0.000377516
POLE4	0.180963	0.000378417
COTL1	0.180951	0.000378769
FDFT1	0.180877	0.000380906
DDX1	0.180772	0.000383957
TCOF1	0.180691	0.000386332
CNPY2	0.180655	0.000387385
SDHA	0.180518	0.000391418
FARSB	0.180464	0.00039303
HIST1H2AB	0.180163	0.00040209
DDIAS	0.180093	0.00040423
LMNB2	0.180075	0.000404771
RPUSD2	0.18004	0.000405855
OR8D2	0.179989	0.000407407
SCARNA20	0.179946	0.000408747
RFX3	0.179896	0.000410275
TRIM28	0.179864	0.000411268
PRSS54	0.179811	0.000412916
EZR	0.179795	0.000413426
NUP160	0.179703	0.000416308
CRY1	0.179541	0.000421436
TRIB2	0.179361	0.000427187
HSD17B8	0.179334	0.000428053
ATG4C	0.179332	0.000428114
NXF3	0.179268	0.000430169
IPO9	0.179141	0.000434302
CLDN22	0.179135	0.000434515
WDR61	0.179075	0.000436473
TXNL1	0.17895	0.000440587
MTPAP	0.178924	0.000441456
FXR1	0.178841	0.000444202
PFN2	0.178832	0.000444501
DRG1	0.178621	0.000451625
DIABLO	0.178357	0.000460629
MAPK6	0.178339	0.000461266
POLR2L	0.178327	0.000461683
SUV39H2	0.178277	0.000463413
BTF3	0.178274	0.000463525
ELP2	0.178247	0.000464455
CEP97	0.178183	0.000466699
ZNF146	0.178149	0.000467873
OR4A5	0.178105	0.000469428
OR5T3	0.178105	0.000469428
VN1R4	0.178105	0.000469428
SPINT3	0.178105	0.000469428
KRTAP13.3	0.178105	0.000469428
SMARCB1	0.178089	0.000469988
EIF3I	0.178064	0.00047085
VTA1	0.17803	0.000472076
SGMS1	0.178028	0.000472116
CNBP	0.17793	0.000475598
POP1	0.177909	0.000476351
EZH2	0.177832	0.000479107
NUDC	0.177824	0.000479401
NKIRAS1	0.177695	0.000484008
C12ORF45	0.177659	0.00048534
RAP2B	0.177606	0.000487234
CCNF	0.177598	0.000487557
CTAGE1	0.177565	0.00048876
FAM86B2	0.177556	0.000489084
MTERF3	0.177392	0.000495104
BUB3	0.177323	0.000497638
CCDC117	0.177258	0.000500049
DHRS7	0.177147	0.000504222
SPC25	0.177089	0.000506401
SIX4	0.176917	0.000512926
SRD5A3	0.176914	0.000513033
TUFM	0.176833	0.000516128
PRR11	0.176789	0.000517812
TOMM40	0.176724	0.00052031
CENPM	0.176721	0.000520443
KCNQ3	0.176712	0.000520768
NDUFS1	0.176703	0.000521117
KPNA5	0.176537	0.00052759
TAF4B	0.176524	0.000528106
USP15	0.176368	0.000534242
LIN9	0.176356	0.000534739
SEC11A	0.176252	0.000538871
LY6E	0.176096	0.000545121
METTL8	0.176091	0.000545319
JAG1	0.176071	0.000546144
CALHM3	0.176049	0.000547039
INSM1	0.175743	0.000559552
SPRED1	0.175652	0.000563329
RPL26L1	0.175649	0.000563439
DBT	0.175542	0.000567927
SMS	0.175497	0.00056982
USP39	0.175488	0.000570195
HEXA	0.175306	0.000577869
RPA1	0.175236	0.000580876
FADS1	0.175208	0.00058208
POLB	0.175135	0.00058523
CCDC34	0.17513	0.00058543
HMSD	0.175089	0.00058721
NFKBIA	0.174986	0.000591673
RCN2	0.174965	0.000592581
KIF14	0.174963	0.000592675
CHSY1	0.174804	0.000599624
MED21	0.174727	0.000603056
TREM1	0.174711	0.000603776
HNRNPD	0.174661	0.000605987
SLCO1B3	0.174518	0.000612386
ICE2	0.174359	0.000619571
ZNF8	0.174339	0.000620479
CCT8	0.17432	0.000621336
RBM18	0.174265	0.000623863
DPH5	0.174262	0.000624004
STRAP	0.174233	0.000625295
DERL2	0.174224	0.000625708
PANK3	0.174221	0.00062588
DNA2	0.174179	0.000627795
AKAP14	0.174178	0.000627838
GNG10	0.174094	0.000631713
NPC2	0.174056	0.000633473
NOP2	0.174045	0.000634001
ATP2B1	0.17402	0.000635137
HAUS4	0.173998	0.000636168
CRELD2	0.173821	0.000644466
CPSF3	0.17374	0.000648299
SYT17	0.17364	0.000653069
ELOC	0.173457	0.000661846
NAPG	0.173408	0.000664213
PPP4R1	0.173379	0.000665621
HELQ	0.173371	0.000666007
WDR36	0.173353	0.000666886
NUDT3	0.173221	0.000673315
BARD1	0.173144	0.000677117
ZNF616	0.173134	0.000677594
RBM28	0.173101	0.000679221
CDCA3	0.173027	0.000682927
VWCE	0.172967	0.000685886
ASH2L	0.172918	0.000688337
MALT1	0.172645	0.000702148
ELAC1	0.172632	0.000702836
SLC27A5	0.172464	0.000711461
PRPF8	0.17246	0.000711643
OR1L4	0.17245	0.000712159
DCTN6	0.172247	0.000722714
TK1	0.172223	0.000723989
SKA2	0.172187	0.00072588
INTS2	0.172132	0.000728803
MTX1	0.172031	0.000734157
HIRIP3	0.171965	0.000737663
RAET1L	0.171935	0.000739242
CD70	0.1719	0.000741124
METTL4	0.171824	0.000745232
ANP32C	0.171796	0.000746733
FASTKD2	0.171724	0.000750618
RBM15	0.171721	0.000750812
DDX28	0.171716	0.000751092
CCL4	0.171679	0.00075306
SPRR2D	0.171632	0.000755629
PYCR3	0.171617	0.000756478
NME1	0.171604	0.000757155
MYL12B	0.171556	0.000759815
STK3	0.1715	0.000762908
ORMDL2	0.17149	0.000763439
IARS2	0.171433	0.000766588
NAT10	0.171322	0.000772761
RPL10A	0.171276	0.000775343
PDIA5	0.17127	0.000775672
OR1F2P	0.171233	0.000777696
IQCG	0.17114	0.000782965
MLEC	0.171128	0.000783637
TNFAIP6	0.170988	0.000791587
ARID2	0.17097	0.000792628
CLN6	0.170944	0.000794062
RIN3	0.170856	0.000799151
LRPPRC	0.170823	0.000801048
MTERF4	0.17082	0.000801205
ARHGAP29	0.170815	0.000801475
ZNF639	0.170809	0.000801847
MAGOHB	0.170808	0.000801901
PPP4R2	0.170703	0.000807993
CTXN1	0.170675	0.00080963
MFSD14B	0.170587	0.000814765
RPL23AP82	0.170466	0.000821871
ANKRD37	0.17045	0.000822789
PSMD14	0.170384	0.000826733
PRKDC	0.17034	0.000829318
F12	0.170133	0.000841757
SNORA80E	0.170003	0.000849626
SDF2L1	0.169962	0.000852134
NHLRC2	0.169912	0.000855159
UTP18	0.169896	0.000856123
TMEM185B	0.169809	0.000861467
NUP93	0.169787	0.000862835
CDT1	0.169759	0.000864552
ACTBL2	0.169674	0.000869833
SCD5	0.16964	0.000871945
PAX4	0.169459	0.000883308
TBC1D21	0.169452	0.000883762
CENPV	0.169416	0.000886027
SLC27A2	0.169395	0.000887357
BTBD6	0.169388	0.000887816
SGO2	0.169257	0.00089616
NAT14	0.169251	0.000896547
SYT12	0.169126	0.000904552
VWA5B2	0.169029	0.00091086
SRBD1	0.168938	0.000916785
GOT2	0.168838	0.00092332
TRUB2	0.168809	0.000925223
ZFYVE26	0.168779	0.000927195
GGCX	0.1687	0.000932419
PLA2G4A	0.16843	0.000950482
ASB3	0.168354	0.000955655
RBM34	0.168322	0.000957792
AADAT	0.168294	0.000959741
TMEM41A	0.168292	0.000959818
ONECUT2	0.168251	0.000962637
SNORA79	0.168078	0.000974552
HACD1	0.16807	0.000975096
DHX29	0.16807	0.000975098
GLOD4	0.168067	0.000975295
DCAF11	0.167992	0.000980487
CD274	0.167947	0.000983622
CSRP2	0.167912	0.000986042
SLC25A17	0.167868	0.000989118
GTF2H4	0.167729	0.000998927
MRPS15	0.167615	0.00100703
TNFRSF10A	0.167549	0.00101168
CHCHD4	0.167472	0.00101723
NUP210	0.167469	0.00101741
KCTD15	0.167437	0.00101976
MRPL37	0.167381	0.0010238
RMI1	0.167378	0.001024
C17ORF53	0.167293	0.00103017
KIF15	0.167288	0.00103052
TXN	0.167248	0.00103345
CWC22	0.167188	0.00103783
RPA2	0.16713	0.0010421
MRPS18C	0.167084	0.00104544
UBE2F	0.167027	0.00104965
GTF2A1	0.167017	0.00105044
HSP90AB2P	0.166883	0.00106037
DYM	0.166876	0.00106091
RRP8	0.166816	0.00106541
FAM83D	0.166661	0.00107707
DNAJB11	0.166646	0.00107818
CREG2	0.16661	0.00108097
PKN2	0.166481	0.00109082
AAGAB	0.166321	0.00110309
CNDP2	0.166297	0.00110495
SDHC	0.166284	0.00110596
XRCC5	0.166273	0.00110687
NEUROD2	0.166074	0.00112241
TFAP2C	0.166058	0.00112362
SCG5	0.165949	0.00113227
TMEM263	0.165879	0.00113781
R3HCC1	0.165804	0.00114385
ERCC8	0.165706	0.00115167
C8ORF76	0.165637	0.00115723
C1ORF74	0.165621	0.00115857
HIST1H2BC	0.165581	0.00116184
NPM3	0.165566	0.00116299
RRM2B	0.165343	0.0011813
RPS3A	0.165325	0.00118275
CALM2	0.165324	0.00118282
UBQLN1	0.165295	0.00118523
MRPS27	0.165287	0.0011859
RPP25	0.165271	0.00118727
LCT	0.165261	0.00118807
SACS	0.165097	0.00120176
NUP155	0.165095	0.00120192
GALNT1	0.164977	0.00121183
ZZZ3	0.164896	0.00121867
EFR3A	0.164866	0.00122126
GUF1	0.16473	0.00123288
TMEM11	0.164569	0.00124674
SUMO2	0.164536	0.00124957
UBE2G1	0.164432	0.00125866
MMP12	0.16438	0.00126319
ZNF584	0.164342	0.00126656
ZNF367	0.164165	0.00128219
MTAP	0.164144	0.00128404
IL17C	0.16404	0.00129339
MCM8	0.164032	0.00129408
OGFRL1	0.16403	0.00129423
B9D1	0.163809	0.00131427
MAP2K1	0.163698	0.00132437
ADGRG5	0.163616	0.00133192
MUC6	0.163588	0.00133447
NEK4	0.163575	0.00133566
CDC25A	0.163538	0.00133908
SARAF	0.163517	0.00134107
RTKN2	0.163472	0.00134523
PTPA	0.163219	0.00136895
CSTF3	0.163215	0.00136934
MTHFD1L	0.163197	0.00137101
OR4F6	0.163144	0.00137603
C18ORF54	0.163142	0.00137618
PSMA1	0.163114	0.00137887
PCNP	0.163114	0.00137892
NUP133	0.163051	0.0013849
MTF2	0.163051	0.00138491
CWC27	0.163019	0.0013879
HOMER1	0.16297	0.00139265
MRPL54	0.162964	0.0013932
ATF5	0.162961	0.00139349
ARID4A	0.162955	0.00139409
KRT6C	0.162923	0.00139712
BMP4	0.162908	0.00139861
OXSM	0.162789	0.00141005
FAM86B1	0.162725	0.00141632
BCLAF1	0.162717	0.00141714
HNRNPA1	0.162647	0.00142395
ISY1	0.162644	0.00142423
ADAM21	0.162643	0.00142433
PPIL4	0.162609	0.00142763
POLR2B	0.162457	0.00144267
LYPLA1	0.162452	0.00144313
ELP4	0.162438	0.00144456
FOXI3	0.162408	0.00144753
TXNRD1	0.162401	0.00144825
C4ORF47	0.162367	0.0014516
TRMT112	0.16236	0.00145229
ARSJ	0.162292	0.00145905
AP2M1	0.16228	0.0014603
ARMT1	0.162276	0.00146074
NLRP13	0.162262	0.0014621
PSMG2	0.162257	0.00146257
PTBP1	0.162173	0.00147106
DMXL2	0.162027	0.00148587
YWHAZ	0.161934	0.00149539
GCNT3	0.161833	0.00150577
GTF2H2C	0.161831	0.0015059
PSMC3	0.16178	0.00151117
POLR1E	0.161763	0.00151294
PDE10A	0.161727	0.00151666
RPL23AP53	0.161635	0.00152632
ZBTB1	0.161628	0.001527
GTSE1	0.161618	0.00152807
NCOR1	0.161552	0.00153499
TNIK	0.161514	0.00153894
SLC16A1	0.161467	0.0015439
ZBTB42	0.161398	0.00155117
LINC01547	0.161365	0.00155466
UGT8	0.161274	0.00156441
TBCA	0.161266	0.00156524
OR8S1	0.161148	0.00157784
POSTN	0.161083	0.00158494
LSM6	0.161016	0.00159217
METTL2A	0.161005	0.00159339
MT1X	0.160731	0.0016233
REEP3	0.160709	0.00162577
RALGAPA1	0.160662	0.00163094
MCAT	0.160606	0.0016372
KLRG2	0.160546	0.00164393
CEP70	0.160527	0.00164597
POLDIP3	0.160434	0.00165643
TNFRSF10D	0.160432	0.00165669
SVIP	0.160381	0.00166244
AKR1A1	0.160372	0.00166339
FBL	0.160264	0.00167564
CHMP7	0.160216	0.00168115
ONECUT3	0.160181	0.0016851
TSPAN5	0.160162	0.00168736
LSM3	0.160161	0.00168747
SEMG2	0.160143	0.00168945
PKP2	0.160055	0.00169965
IMPAD1	0.160033	0.00170215
NKAIN1	0.159963	0.00171023
EYA3	0.159887	0.00171906
NDUFA12	0.159857	0.00172256
RAB2A	0.159855	0.00172281
BCL2L12	0.159793	0.00173007
PTRH2	0.159759	0.00173403
RAB27B	0.159699	0.00174104
TMEM97	0.159693	0.00174172
NCAPD2	0.159675	0.0017439
TRUB1	0.159655	0.0017463
PNMA2	0.159636	0.00174848
CS	0.159576	0.00175565
EIF3D	0.159551	0.00175861
OR4C3	0.159471	0.00176808
TWSG1	0.159395	0.00177716
MED11	0.159275	0.00179169
NEK1	0.159259	0.00179363
HIST1H3B	0.159232	0.00179686
TENT4B	0.159186	0.00180239
P2RY1	0.159168	0.00180467
FUT1	0.159079	0.00181544
HJURP	0.159045	0.00181961
DPCD	0.159044	0.00181982
CCL3	0.159038	0.00182053
EXOG	0.159007	0.00182435
DSE	0.158999	0.00182527
HNRNPA2B1	0.158882	0.00183969
GPR158	0.158864	0.00184204
DHX33	0.15873	0.00185872
DNAH2	0.158685	0.00186424
WDR62	0.158675	0.00186551
SMNDC1	0.158667	0.00186657
SUPV3L1	0.158565	0.00187939
MLN	0.158542	0.00188226
CCDC43	0.158532	0.00188355
FLVCR2	0.158529	0.00188397
KRT13	0.158513	0.00188602
S100A9	0.158336	0.00190846
RRP1B	0.158286	0.001915
UTP15	0.158276	0.00191624
FRK	0.158268	0.00191727
AIDA	0.15821	0.00192466
DHX36	0.158125	0.00193571
ATF1	0.158107	0.00193806
C5ORF15	0.158071	0.00194276
DBF4	0.158044	0.00194631
ISG20L2	0.15802	0.00194935
REEP4	0.157949	0.00195873
ACPP	0.157921	0.00196232
SLN	0.157887	0.00196683
C17ORF49	0.157884	0.00196729
DNAJB14	0.157804	0.00197773
MOAP1	0.157785	0.00198032
GBP6	0.157771	0.00198217
GLO1	0.157605	0.00200426
HAPLN3	0.157599	0.00200505
CDRT1	0.157558	0.00201058
CCDC68	0.157343	0.0020396
LY6K	0.157263	0.00205058
C1QL4	0.157172	0.00206299
BOK	0.157126	0.00206942
PHF5A	0.157094	0.00207379
VCL	0.157057	0.00207895
BCCIP	0.156945	0.00209447
CNOT7	0.156917	0.00209837
WTAP	0.156872	0.00210469
PELO	0.156869	0.00210506
PPP3CA	0.156791	0.00211604
ARL9	0.156685	0.00213108
TXNL4B	0.156635	0.00213813
UBE2N	0.156632	0.00213855
CLPB	0.156628	0.00213913
GEMIN7	0.156571	0.00214717
BRCA1	0.156566	0.00214794
ECE2	0.156547	0.00215072
IBSP	0.15652	0.00215451
TANC2	0.156504	0.00215686
C12ORF4	0.156444	0.00216538
CIAPIN1	0.156444	0.00216545
FDPS	0.156385	0.00217398
HMGN1	0.156347	0.00217942
LILRA3	0.156214	0.00219867
ACTL8	0.156115	0.0022132
AEN	0.156048	0.0022231
MRPL27	0.155989	0.0022317
DNAJC17	0.155929	0.0022407
THUMPD1	0.155852	0.00225215
TPM3	0.155826	0.00225592
BST2	0.155792	0.002261
MIPOL1	0.155757	0.00226633
TRMO	0.155724	0.00227118
HDDC2	0.155579	0.00229304
ANXA2P2	0.155568	0.00229468
WNK1	0.155553	0.0022971
ROBO3	0.155538	0.00229935
ME1	0.155412	0.00231856
GPATCH4	0.1554	0.0023204
CHD1L	0.155331	0.00233097
CCL7	0.15531	0.0023341
MTMR9	0.155279	0.00233901
LIPG	0.155273	0.00233985
DEGS2	0.15514	0.00236044
ADAM11	0.155127	0.00236243
KIF18B	0.155006	0.00238134
HNRNPH1	0.155003	0.0023819
LRRC42	0.154941	0.00239155
CFAP57	0.154843	0.00240703
EML5	0.154841	0.00240736
TNFSF9	0.154804	0.00241323
TIGD2	0.154784	0.00241649
HNRNPA3	0.154767	0.0024191
ZIC5	0.154742	0.00242311
ALDOA	0.154558	0.00245261
PNO1	0.15453	0.00245704
DTWD2	0.154491	0.00246346
TXN2	0.154475	0.00246602
PES1	0.154454	0.0024694
DFFA	0.154388	0.00248011
GABRP	0.154384	0.00248077
ADPGK	0.15436	0.00248467
EIF3M	0.154295	0.00249531
APBB2	0.154262	0.00250075
CERCAM	0.154237	0.0025048
SELENOT	0.154206	0.00250989
ZCCHC2	0.154162	0.00251711
LRP10	0.154137	0.00252121
CCDC138	0.154113	0.00252516
TMEM131L	0.1541	0.00252734
USP18	0.154065	0.00253315
FAM234B	0.154052	0.0025354
ZNF473	0.154043	0.00253681
NLN	0.153963	0.00255017
LY6D	0.153961	0.00255045
FASTKD5	0.153897	0.00256114
CKAP4	0.153887	0.00256289
ARMH4	0.153878	0.00256433
FAM169A	0.153875	0.00256479
FANCG	0.153829	0.00257258
SPRR3	0.153787	0.00257969
ASCC3	0.153577	0.00261538
SARS2	0.153548	0.00262021
TSEN15	0.153523	0.00262449
SNRPD2	0.153351	0.00265408
SPRR1B	0.1533	0.00266301
RABEPK	0.153286	0.00266546
LSM2	0.153216	0.00267769
STK33	0.153069	0.00270334
HSPA1B	0.153022	0.00271158
DEFB109A	0.152909	0.00273158
SEC11C	0.152899	0.00273345
FOXA1	0.152853	0.00274158
BIK	0.152821	0.00274742
CNN3	0.152776	0.00275533
SELENOF	0.152555	0.00279513
KHNYN	0.152415	0.00282072
RPLP0	0.152317	0.00283866
OGFOD1	0.152207	0.00285897
SLTM	0.15219	0.0028622
DUSP10	0.152138	0.00287182
TRIT1	0.15206	0.00288641
TENT5A	0.152039	0.00289017
CGB5	0.15201	0.00289567
BRIX1	0.151974	0.00290239
CXCL8	0.151843	0.00292712
NDRG1	0.151811	0.00293326
PMAIP1	0.151782	0.00293877
CIAO2A	0.151763	0.00294235
MSH6	0.151675	0.00295911
C9ORF85	0.151667	0.00296066
UBASH3B	0.151518	0.00298913
ITGB1BP1	0.151349	0.00302193
ACYP1	0.151298	0.00303186
ADGRG6	0.151269	0.00303755
C4ORF51	0.15125	0.00304126
NEMP2	0.151228	0.00304567
NKX3.1	0.151089	0.00307292
TAF9	0.151086	0.00307354
DDX23	0.151075	0.00307568
LETM2	0.150844	0.00312178
TBL1XR1	0.150809	0.00312885
BNIP1	0.150742	0.00314238
ADCK1	0.150731	0.00314456
SPHK1	0.150714	0.00314793
FLVCR1	0.150637	0.0031636
C1D	0.150439	0.0032039
RNF111	0.150439	0.00320393
TOB2	0.150428	0.00320622
DYRK3	0.150388	0.00321451
FAM98A	0.150371	0.00321805
KCTD9	0.150333	0.00322584
PPIF	0.150289	0.00323486
EIF4G1	0.150254	0.00324218
SSBP1	0.150229	0.00324741
GCN1	0.150221	0.00324893
KRT84	0.150088	0.00327678
PPM1L	0.15004	0.00328679
H3F3C	0.150034	0.00328803
ODF2	0.14992	0.0033122
MMP13	0.149891	0.00331824
CNDP1	0.149867	0.00332332
LCE1B	0.149832	0.00333077
BTF3L4	0.149766	0.00334488
ALCAM	0.149734	0.00335179
KARS	0.149731	0.00335245
EMG1	0.149697	0.00335975
NOC2L	0.149652	0.00336927
NT5DC1	0.14948	0.00340651
INTS9	0.149476	0.00340743
INF2	0.149402	0.0034235
RAB11A	0.149293	0.00344736
RABEP1	0.149263	0.00345388
P3H1	0.149255	0.00345567
GADD45GIP1	0.149207	0.00346623
OR2A5	0.149142	0.00348068
DIAPH3	0.149129	0.00348356
SREBF1	0.149113	0.00348703
DYRK4	0.149113	0.00348712
AK1	0.149079	0.0034945
MRPL40	0.149005	0.00351111
UTP6	0.148974	0.00351792
RSL1D1	0.148925	0.00352902
ANOS1	0.148888	0.00353734
GAGE12J	0.148851	0.00354563
DCUN1D1	0.148781	0.00356127
GTF2H2B	0.148763	0.00356552
PPP1R8	0.148702	0.00357934
FAM27E5	0.148617	0.00359869
KIAA1958	0.148616	0.00359884
ASPM	0.148575	0.00360818
RPS27A	0.14856	0.00361157
TMEM229B	0.148559	0.00361178
FBXO25	0.148501	0.00362509
TRAIP	0.148487	0.00362848
RFC1	0.148218	0.00369076
SMC1A	0.148172	0.00370136
MRPS35	0.148169	0.00370215
CTCF	0.148122	0.00371309
PITPNC1	0.148104	0.00371739
ARSI	0.148065	0.00372662
PDK1	0.148	0.00374198
CETN3	0.147998	0.00374245
ANXA10	0.147919	0.00376103
DNMT1	0.147851	0.00377722
USP48	0.147825	0.00378361
THOC3	0.14782	0.00378469
IREB2	0.147802	0.00378892
GAL	0.147778	0.00379469
SEC22B	0.147723	0.00380794
RIOK2	0.147723	0.00380795
CEP83	0.147656	0.00382417
HIST1H4D	0.147635	0.00382902
ST18	0.14761	0.00383518
EIF3E	0.147423	0.00388065
OSR1	0.147347	0.00389917
PPCDC	0.14728	0.00391557
LETM1	0.147065	0.00396887
ISCA1P1	0.147032	0.00397711
P3H3	0.146866	0.0040188
BPESC1	0.146855	0.00402156
PYM1	0.146853	0.00402203
SART3	0.146819	0.00403085
PSMD3	0.1468	0.00403553
UBA5	0.146654	0.00407269
CENPW	0.146603	0.0040857
KRT2	0.146586	0.00408995
UFSP2	0.146563	0.0040959
GDF11	0.146533	0.00410363
SRP68	0.146527	0.00410517
PARVB	0.146454	0.00412387
C12ORF57	0.146408	0.00413581
TSPYL1	0.146161	0.00420014
SLC30A9	0.146148	0.00420364
FAR1	0.146039	0.00423232
UPF3B	0.14596	0.00425322
SLC25A21	0.14595	0.00425608
CCL18	0.145918	0.00426457
PCBD1	0.145904	0.00426817
DTYMK	0.145903	0.00426837
MT1E	0.145818	0.00429114
ERCC6L	0.145776	0.00430244
IBTK	0.145714	0.00431906
KCNU1	0.145608	0.00434778
ZNF644	0.145574	0.00435681
C12ORF29	0.14557	0.00435791
XRCC2	0.145563	0.00435996
FER	0.145526	0.00436988
IDH3A	0.145495	0.00437823
KCNK10	0.145389	0.00440737
C2ORF80	0.145387	0.00440785
CDK4	0.145372	0.00441202
LARP7	0.145339	0.00442113
YTHDF3	0.145233	0.00445038
LGALS3	0.145213	0.00445574
C16ORF92	0.145141	0.00447568
FOXL2	0.145109	0.00448467
ALDOC	0.145053	0.00450026
C20ORF27	0.144972	0.004523
CLEC4E	0.144918	0.00453821
TCN1	0.14489	0.00454599
LAP3	0.144886	0.00454717
IMP3	0.144854	0.00455609
AZIN1	0.144665	0.00460991
QSOX1	0.144645	0.00461546
RPL6	0.144584	0.00463298
CLOCK	0.144536	0.0046468
HDHD5	0.14447	0.00466582
PPP5C	0.144441	0.00467431
PDCD2L	0.14443	0.00467737
SNHG10	0.144423	0.00467951
KRT17	0.144403	0.00468532
HAUS1	0.144373	0.004694
SNRPB2	0.144371	0.0046945
POLQ	0.144304	0.00471398
ENTR1	0.14427	0.00472389
TFRC	0.14419	0.0047473
PLA2G7	0.144174	0.00475203
HIST1H2BB	0.144146	0.00476018
EXOC6	0.144126	0.00476615
FUT11	0.144119	0.00476811
PRR3	0.144017	0.0047982
C1ORF53	0.143981	0.00480876
SLC25A37	0.143897	0.00483395
KIF21A	0.143857	0.00484583
COL5A3	0.14377	0.00487193
IMMP1L	0.143756	0.00487608
LEPROTL1	0.143632	0.0049133
IDH1	0.143563	0.00493433
SLAMF9	0.143538	0.00494196
LINC02693	0.143508	0.00495108
FCGR3A	0.14338	0.0049902
HOXC6	0.143341	0.00500219
PRPF38B	0.14334	0.00500227
RANGRF	0.143338	0.00500286
HAGHL	0.143336	0.00500349
RBM27	0.143317	0.00500943
TRIM69	0.143301	0.00501443
TNS4	0.143182	0.00505121
SRRT	0.143151	0.00506061
PRPF40A	0.143141	0.00506388
UQCRB	0.143088	0.00508044
NGRN	0.143084	0.0050815
RPL13AP20	0.142865	0.0051504
TTLL12	0.1428	0.00517069
EDC3	0.14273	0.00519303
MMP1	0.142664	0.0052141
COL11A1	0.142531	0.00525666
ESYT1	0.142355	0.00531323
SNAP47	0.142345	0.00531648
GFM1	0.142298	0.00533176
SLC25A22	0.14226	0.00534432
PSTK	0.142258	0.00534506
FBXW10	0.142256	0.00534559
ANXA2P3	0.142188	0.00536792
ASNA1	0.142166	0.00537498
ZNHIT6	0.14215	0.00538039
ZNF702P	0.142128	0.00538734
POLR2F	0.142037	0.00541746
CNOT2	0.142032	0.00541917
KIF2A	0.141934	0.00545141
PKMYT1	0.14191	0.00545936
C18ORF21	0.14188	0.00546942
SSR1	0.141871	0.00547246
SAMD8	0.141839	0.00548329
C1ORF109	0.141836	0.00548425
AGR3	0.141823	0.00548865
EGFL6	0.141809	0.00549329
GBP1	0.141792	0.00549901
LHB	0.14174	0.00551643
WRB	0.141695	0.0055313
CXCL11	0.141635	0.00555164
MINDY2	0.14155	0.00558048
UBE2K	0.141545	0.00558201
ESPL1	0.14149	0.00560078
PROX2	0.141489	0.00560093
ECHS1	0.141469	0.00560801
ZNF280D	0.141449	0.00561464
GTF3C5	0.141432	0.00562034
OSR2	0.141424	0.00562339
FAM136A	0.141376	0.00563952
FPR2	0.141356	0.0056465
SNRPB	0.141356	0.00564656
ASF1A	0.14135	0.00564843
SRD5A1	0.141327	0.00565634
YDJC	0.141322	0.00565819
TNFAIP8	0.141298	0.00566653
RPL17	0.141262	0.00567861
RFC2	0.141256	0.00568072
ZMYM4	0.141195	0.00570193
ANXA2P1	0.141149	0.00571781
RELT	0.141113	0.00573036
UBQLN4	0.14105	0.00575211
LHX9	0.140845	0.00582416
CEP170	0.140819	0.00583336
PSMD6	0.140709	0.00587218
LCE1E	0.140677	0.00588366
PCDHB8	0.140656	0.00589084
FOSL1	0.140629	0.00590075
POLD2	0.140627	0.00590131
RBM4	0.140626	0.00590159
INTS8	0.140522	0.00593887
TIMM50	0.140496	0.0059483
COX10	0.140426	0.00597342
PIK3C3	0.140413	0.00597818
GMPS	0.140409	0.00597959
RWDD2B	0.140377	0.00599087
MKKS	0.140346	0.00600239
LOXL3	0.14034	0.00600443
CRYBA2	0.140269	0.00603014
FAM57A	0.140121	0.00608419
YWHAH	0.140038	0.00611482
RECQL4	0.139976	0.00613742
A2ML1	0.13992	0.00615837
RBMX	0.139877	0.00617413
HIST1H3A	0.139835	0.0061896
CSNK2A1	0.139825	0.0061933
DMC1	0.139813	0.00619798
HSCB	0.139792	0.00620583
SPRR2A	0.139734	0.00622756
ZKSCAN3	0.139716	0.006234
AGPAT4	0.139569	0.00628945
CHAF1A	0.139556	0.00629427
RPAP1	0.139549	0.00629705
THOP1	0.13953	0.00630413
ZBTB6	0.1395	0.00631549
FOXRED2	0.139349	0.00637295
APEH	0.139276	0.00640093
RNASEH2A	0.139262	0.00640626
PRCC	0.139261	0.00640666
SNAI2	0.139229	0.00641902
INHBA	0.139202	0.00642922
LZIC	0.139191	0.00643361
ZBTB37	0.13917	0.00644163
ASAH2B	0.139123	0.00645965
ACTL6A	0.139116	0.00646257
HES7	0.139105	0.00646689
ZNF280C	0.139072	0.00647963
CENPH	0.139034	0.00649436
STX18	0.139009	0.00650397
SHF	0.138958	0.00652385
NPSR1	0.138955	0.00652507
ADAMTS2	0.13884	0.00657006
APOL4	0.138814	0.00658014
GNB5	0.138793	0.0065884
DNAJC9	0.138752	0.00660459
JPH1	0.13866	0.00664089
TMEM231	0.138637	0.00665035
GAGE2D	0.138525	0.0066947
SOX12	0.13852	0.00669671
HTR5A	0.138454	0.00672315
C11ORF16	0.138438	0.00672972
RBBP5	0.138412	0.00674011
ADH5	0.138311	0.00678061
PTCD3	0.138295	0.00678702
GLS2	0.13828	0.00679324
RGS16	0.138211	0.00682105
ENOSF1	0.138145	0.00684804
ETNK1	0.138132	0.0068534
MUC1	0.138117	0.00685943
VSNL1	0.138066	0.00688043
TSN	0.138023	0.00689787
[truncated: 15,990 more rows]
