# Supplementary material for: High expression of HSP90 is associated with poor prognosis in patients with colorectal cancer
Source: PeerJ. 2019 Oct 31;7:e7946. doi: 10.7717/peerj.7946 (PMC6825748; doi:10.7717/peerj.7946)
Supplement: Supplemental Information 5 [file peerj-07-7946-s005.xlsx]

## Sheet: Sheet1
ID	Age	Sex	Pathology	Tumor Differentiation	Location	T phase	N phase	M phase	Ajcc	Survival	Survival time (month)	HSP90
RDgCol0609A0277	62	Male	Tubular adenocarcinoma	Moderate	Ascending colon	T3	N0	M0	2A	Survival	97	1
RDgCol0609A0278	81	Female	Tubular adenocarcinoma	Moderate	Sigmoid colon	T3	N0	M0	2A	Survival	97	1
RDgCol0609A0280	75	Male	Mucinous adenocarcinoma	Low	Ascending colon	T4b	N0	M0	2C	Death	40	2
RDgCol0609A0283	73	Female	Tubular+mucinous adenocarcinoma	Moderate-low	Transverse colon	T3	N1b	M1b	4B	Death	3	2
RDgCol0609A0284	75	Male	Tubular adenocarcinoma	Moderate	Ascending colon	T4a	N1b	M0	3B	Death	24	2
RDgCol0609A0285	70	Female	Tubular adenocarcinoma	Moderate-low	Sigmoid colon	T3	N1a	M0	3B	Death	55	2
RDgCol0609A0287	55	Male	Tubular adenocarcinoma	Moderate-low	Ascending colon	T3	N0	M0	2A	Survival	96	2
RDgCol0609A0288	58	Female	Tubular adenocarcinoma	Moderate-low	Sigmoid colon	T3	N2a	M0	3B	Death	30	2
RDgCol0609A0289	72	Male	Mucinous adenocarcinoma	Moderate-low	Sigmoid colon	T3	N0	M0	2A	Death	5	1
RDgCol0609A0291	62	Female	Tubular adenocarcinoma	Moderate-low	Descending colon	T3	N0	M0	2A	Survival	95	1
RDgCol0609A0293	75	Female	Tubular adenocarcinoma	Moderate	Ascending colon	T3	N1b	M0	3B	Death	62	2
RDgCol0609A0296	80	Male	Tubular adenocarcinoma	Moderate	Ascending colon	T3	N0	M0	2	Death	55	2
RDgCol0609A0297	71	Male	Tubular adenocarcinoma	Moderate	Ascending colon	T3	N0	M0	2A	Survival	96	1
RDgCol0609A0298	59	Female	Tubular adenocarcinoma	Moderate-low	Sigmoid colon	T3	N0	M0	2A	Survival	95	2
RDgCol0611A0309	83	Male	Tubular adenocarcinoma	High-moderate	Transverse colon	T4b	N1b	M0	3C	Death	26	2
RDgCol0611A0311	52	Female	Tubular adenocarcinoma	Moderate	Ascending colon	T3	N2a	M0	3B	Death	25	1
RDgCol0611A0312	80	Male	Tubular adenocarcinoma	Moderate-low	Transverse colon	T3	N0	M0	2A	Survival	95	2
RDgCol0611A0313	81	Male	Tubular adenocarcinoma	Moderate-low	Descending colon	T3	N0	M0	2A	Death	56	1
RDgCol0611A0314	75	Male	Tubular adenocarcinoma	Low	Transverse colon	T3	N0	M0	2A	Death	34	1
RDgCol0611A0317	75	Male	Tubular adenocarcinoma	Moderate-low	Sigmoid colon	T3	N1b	M0	3B	Death	13	2
RDgCol0611A0318	72	Male	Tubular adenocarcinoma	Low	Transverse colon	T3	N0	M0	2A	Survival	94	2
RDgCol0611A0319	65	Female	Tubular adenocarcinoma	Low	Ascending colon	T3	N1b	M0	3	Survival	94	1
RDgCol0611A0322	56	Male	Tubular adenocarcinoma	Moderate	Transverse colon	T3	N0	M0	2A	Survival	94	2
RDgCol0611A0324	65	Male	Tubular adenocarcinoma	Moderate	Descending colon	T3	N0	M0	2A	Survival	94	1
RDgCol0611A0325	90	Female	Tubular adenocarcinoma	Moderate	Ascending colon	T3	N0	M0	2A	Death	12	2
RDgCol0611A0327	71	Male	Tubular adenocarcinoma	Moderate-low	Transverse colon	T3	N1b	M1b	4B	Death	8	2
RDgCol0612A0334	76	Female	Tubular adenocarcinoma	Moderate-low	Sigmoid colon	T4b	N1a	M0	3C	Death	28	2
RDgCol0612A0335	75	Male	Tubular+mucinous adenocarcinoma	Low	Transverse colon	T2	N1a	M0	3	Death	20	2
RDgCol0612A0336	76	Male	Tubular adenocarcinoma	Moderate-low	Transverse colon	T3	N0	M0	2A	Death	52	1
RDgCol0612A0337	72	Male	Tubular adenocarcinoma	Moderate-low	Ascending colon	T3	N2a	M1b	4B	Death	13	1
RDgCol0612A0339	38	Male	Tubular adenocarcinoma	Moderate-low	Sigmoid colon	T4a	N0	M0	2B	Death	26	2
RDgCol0612A0340	61	Male	Tubular adenocarcinoma	Moderate	Sigmoid colon	T3	N0	M0	2A	Survival	93	2
RDgCol0612A0341	65	Female	Tubular adenocarcinoma	Moderate-low	Ascending colon	T4a	N0	M0	2B	Death	79	2
RDgCol0612A0343	79	Male	Tubular adenocarcinoma	Moderate	Sigmoid colon	T3	N0	M0	2A	Survival	93	1
RDgCol0612A0345	72	Male	Tubular adenocarcinoma	Moderate	Transverse colon	T4a	N0	M0	2B	Survival	93	1
RDgCol0612A0346	74	Female	Tubular adenocarcinoma	Moderate	Ascending colon	T4b	N2a	M0	3C	Death	1	2
RDgCol0612A0352	50	Male	Tubular adenocarcinoma	High	Transverse colon	T3	N0	M0	2A	Death	40	2
RDgCol0612A0353	82	Female	Tubular adenocarcinoma	Moderate	Transverse colon	T3	N1b	M0	3B	Survival	92	1
RDgCol0612A0356	56	Female	Tubular+mucinous adenocarcinoma	Moderate	Transverse colon	T4a	N0	M0	2B	Death	87	2
RDgCol0701A0395	74	Male	Tubular adenocarcinoma	Moderate	Descending colon	T2	N1a	M0	3A	Death	20	2
RDgCol0701A0398	72	Male	Tubular adenocarcinoma	Low	Ascending colon	T3	N0	M0	2A	Survival	92	1
RDgCol0701A0400	62	Male	Tubular adenocarcinoma	Moderate	Descending colon	T3	N0	M0	2A	Survival	89	1
RDgCol0701A0402	60	Male	Mucinous adenocarcinoma	Moderate-low	Ascending colon	T3	N1a	M0	3B	Death	23	1
RDgCol0701A0403	78	Male	Tubular adenocarcinoma	Moderate-low	Sigmoid colon	T3	N1a	M0	3B	Death	72	1
RDgCol0701A0404	80	Male	Tubular adenocarcinoma	Low	Ascending colon	T4b	N0	M0	2C	Death	6	1
RDgCol0704A0431	78	Male	Tubular adenocarcinoma	High-moderate	Sigmoid colon	T1	N0	M0	1	Survival	88	1
RDgCol0704A0435	62	Male	Tubular adenocarcinoma	Moderate-low	Transverse colon	T3	N0	M0	2A	Death	16	2
RDgCol0704A0436	69	Female	Tubular adenocarcinoma	Low	Transverse colon	T3	N0	M0	2A	Survival	91	2
RDgCol0704A0437	71	Female	Tubular adenocarcinoma	Low	Ascending colon	T2	N0	M0	1	Death	18	2
RDgCol0704A0438	70	Female	Tubular adenocarcinoma	Moderate	Sigmoid colon	T3	N1b	M0	3B	Survival	91	2
RDgCol0704A0440	83	Female	Tubular adenocarcinoma	High	Sigmoid colon	T2	N0	M0	1	Survival	92	1
RDgCol0704A0441	79	Female	Tubular adenocarcinoma	Moderate	Transverse colon	T4b	N1b	M0	3C	Death	16	1
RDgCol0704A0447	80	Female	Tubular adenocarcinoma	Moderate	Sigmoid colon	T3	N0	M0	2A	Death	52	2
RDgCol0704A0475	90	Male	Tubular adenocarcinoma	Moderate-low	Ascending colon	T3	N0	M0	2A	Death	36	2
RDgCol0704A0476	48	Male	Tubular adenocarcinoma	Low	Descending colon	T4b	N0	M0	2C	Death	5	2
RDgCol0704A0452	70	Female	Tubular+mucinous adenocarcinoma	Moderate	Ascending colon	T3	N0	M0	2A	Survival	96	1
RDgCol0704A0453	84	Female	Mucinous adenocarcinoma	Low	Ascending colon	T3	N1a	M0	3B	Death	14	1
RDgCol0704A0458	57	Female	Tubular adenocarcinoma	Moderate-low	Sigmoid colon	T2	N0	M0	1	Survival	89	2
RDgCol0704A0459	65	Male	Tubular adenocarcinoma	Moderate	Sigmoid colon	T3	N0	M0	2A	Survival	89	1
RDgCol0704A0460	80	Male	Tubular+mucinous adenocarcinoma	High-moderate	Ascending colon	T3	N0	M0	2A	Death	62	1
RDgCol0704A0463	67	Male	Tubular adenocarcinoma	Moderate-low	Descending colon	T3	N1b	M0	3B	Death	29	1
RDgCol0704A0465	72	Male	Tubular adenocarcinoma	Moderate	Transverse colon	T3	N1a	M0	3B	Death	29	1
RDgCol0704A0466	70	Female	Mucinous adenocarcinoma	Low	Transverse colon	T3	N0	M0	2A	Death	28	2
RDgCol0705A0525	57	Female	Tubular adenocarcinoma	Moderate-low	Sigmoid colon	T3	N1a	M0	3B	Survival	88	2
RDgCol0705A0527	50	Female	Tubular adenocarcinoma	Moderate-low	Descending-Sigmoid colon	T3	N0	M0	2A	Survival	88	2
RDgCol0705A0528	62	Male	Tubular adenocarcinoma	Moderate	Sigmoid colon	T3	N0	M0	2A	Death	50	2
RDgCol0705A0529	77	Female	Tubular adenocarcinoma	Moderate	Sigmoid colon	T3	N0	M0	2A	Survival	88	2
RDgCol0705A0530	84	Female	Tubular adenocarcinoma	Moderate	Sigmoid colon	T2	N0	M0	1	Survival	88	1
RDgCol0705A0531	80	Male	Tubular adenocarcinoma	Low	Ascending colon	T3	N1b	M0	3B	Survival	88	1
RDgCol0705A0532	65	Female	Tubular adenocarcinoma	Moderate	Transverse colon	T3	N0	M0	2A	Survival	88	2
RDgCol0705A0535	74	Male	Tubular adenocarcinoma	Moderate	Sigmoid colon	T3	N0	M0	2A	Death	82	1
RDgCol0705A0537	65	Female	Tubular adenocarcinoma	Moderate	Ascending colon	T3	N2a	M0	3B	Survival	88	2
RDgCol0705A0538	74	Male	Tubular adenocarcinoma	High-moderate	Sigmoid colon	T3	N0	M0	2A	Death	56	2
RDgCol0705A0539	71	Female	Mucinous adenocarcinoma	Low	Descending colon	T3	N2a	M0	3B	Death	15	1
RDgCol0705A0541	67	Female	Tubular adenocarcinoma	Moderate-low	Sigmoid colon	T3	N1b	M0	3B	Death	24	2
RDgCol0705A0544	73	Female	Tubular adenocarcinoma	Moderate	Transverse colon	T3	N0	M0	2A	Death	6	2
RDgCol0706A0575	62	Male	Tubular adenocarcinoma	Moderate	Transverse colon	T2	N0	M0	1	Death	80	2
RDgCol0706A0576	78	Female	Tubular adenocarcinoma	Moderate	Ascending colon	T3	N1a	M0	3B	Death	29	2
RDgCol0706A0577	76	Male	Tubular adenocarcinoma	Moderate	Ascending colon	T3	N0	M0	2A	Death	11	1
RDgCol0609A0286	67	Female	Tubular adenocarcinoma	Moderate	Ascending colon	T4a	N1a	M0	3B	Death	10	2
RDgCol0609A0294	48	Male	Tubular adenocarcinoma	Moderate-low	Ascending colon	T3	N2a	M0	3B	Death	18	2
RDgCol0609A0295	24	Female	Tubular adenocarcinoma	Moderate-low	Transverse colon	T3	N2a	M0	3B	Death	51	1
RDgCol0611A0310	73	Female	Tubular+mucinous adenocarcinoma	Low	Ascending colon	T3	N2a	M0	3B	Death	5	1
RDgCol0611A0316	74	Male	Tubular adenocarcinoma	Moderate	Sigmoid colon	T1	N1a	M0	3A	Survival	94	2
RDgCol0612A0338	68	Female	Tubular adenocarcinoma	Low	Transverse colon	T3	N1b	M0	3B	Death	9	2
RDgCol0612A0347	42	Male	Tubular adenocarcinoma	Low	Sigmoid colon	T2	N1b	M0	3A	Death	13	2
RDgCol0701A0401	62	Female	Tubular adenocarcinoma	Moderate	Ascending colon	T3	N2b	M0	3C	Death	21	2
RDgCol0701A0405	62	Female	Tubular adenocarcinoma	Low	Ascending colon	T3	N2b	M0	3C	Death	12	1
RDgCol0704A0432	67	Male	Tubular adenocarcinoma	Moderate	Ascending colon	T3	N0	M0	2A	Survival	91	2
RDgCol0704A0442	89	Male	Tubular adenocarcinoma	Low	Ascending colon	T3	N0	M0	2A	Death	70	2
RDgCol0704A0443	62	Male	Tubular adenocarcinoma	Low	Ascending colon	T3	N0	M0	2A	Survival	90	2
RDgCol0704A0444	52	Male	Mucinous adenocarcinoma	Low	Descending colon	T3	N0	M0	2A	Survival	92	1
RDgCol0704A0455	54	Female	Tubular adenocarcinoma	Moderate	Ascending colon	T3	N0	M0	2A	Survival	87	1
RDgCol0704A0461	79	Female	Tubular+mucinous adenocarcinoma	Moderate	Ascending colon	T3	N1b	M0	3B	Survival	89	1
RDgCol0705A0533	76	Female	Tubular adenocarcinoma	Moderate	Sigmoid colon	T3	N0	M0	2A	Death	34	2
RDgCol0705A0540	54	Female	Tubular adenocarcinoma	Low	Sigmoid colon	T4a	N1a	M0	3B	Survival	88	1
RDgCol0705A0542	73	Male	Tubular adenocarcinoma	Moderate	Transverse colon	T3	N0	M0	2A	Death	62	1
RDgCol0706A0579	58	Male	Tubular adenocarcinoma	High-moderate	Sigmoid colon	T3	N0	M0	2A	Survival	88	1
RDgCol0706A0580	53	Male	Tubular adenocarcinoma	Low	Transverse colon	T3	N0	M0	2A	Survival	87	1
