# Supplementary material for: High expression of HSP90 is associated with poor prognosis in patients with colorectal cancer
Source: PeerJ journal article supplement (doi:10.7717/peerj.7946), 2019-10-31

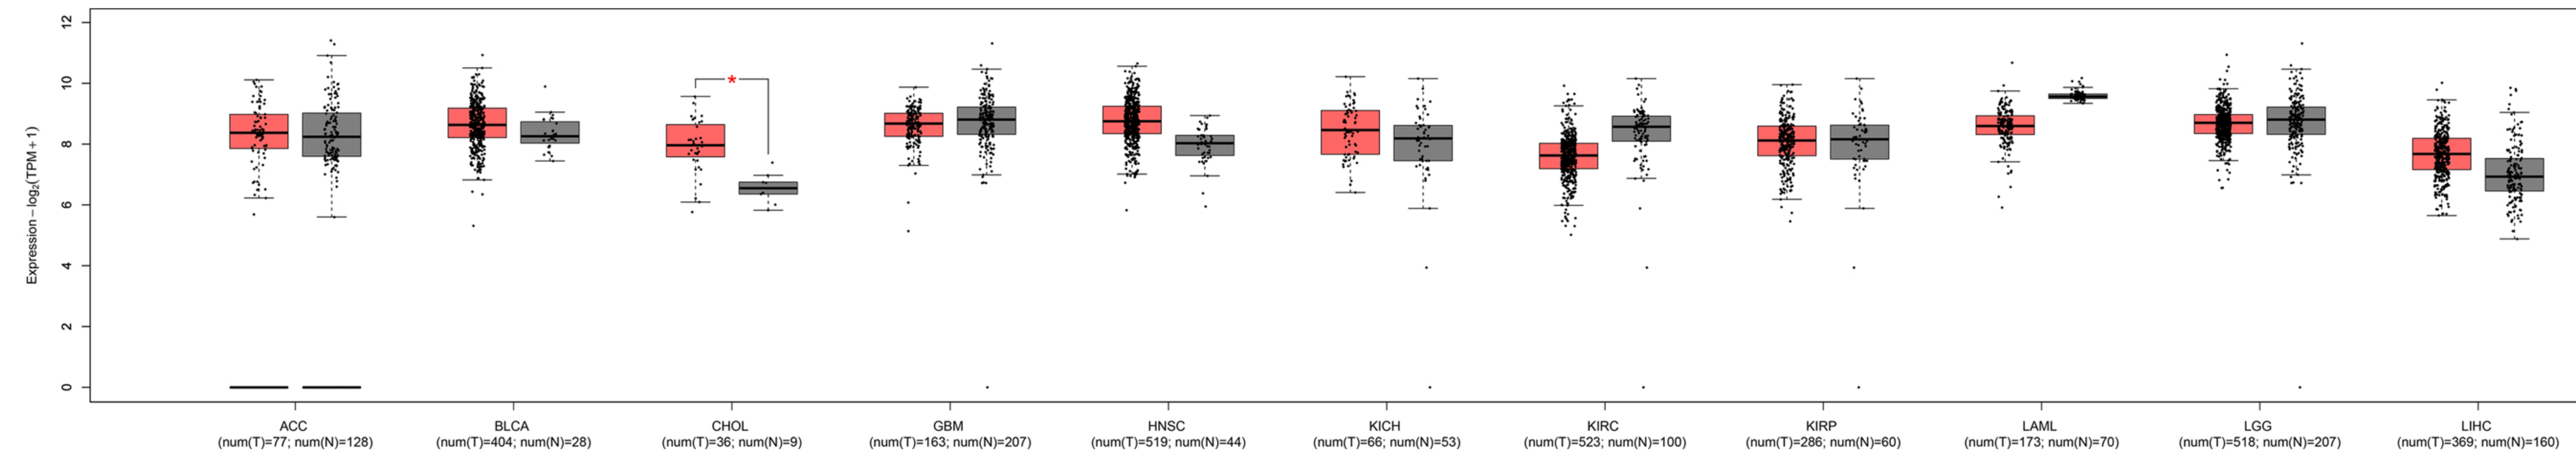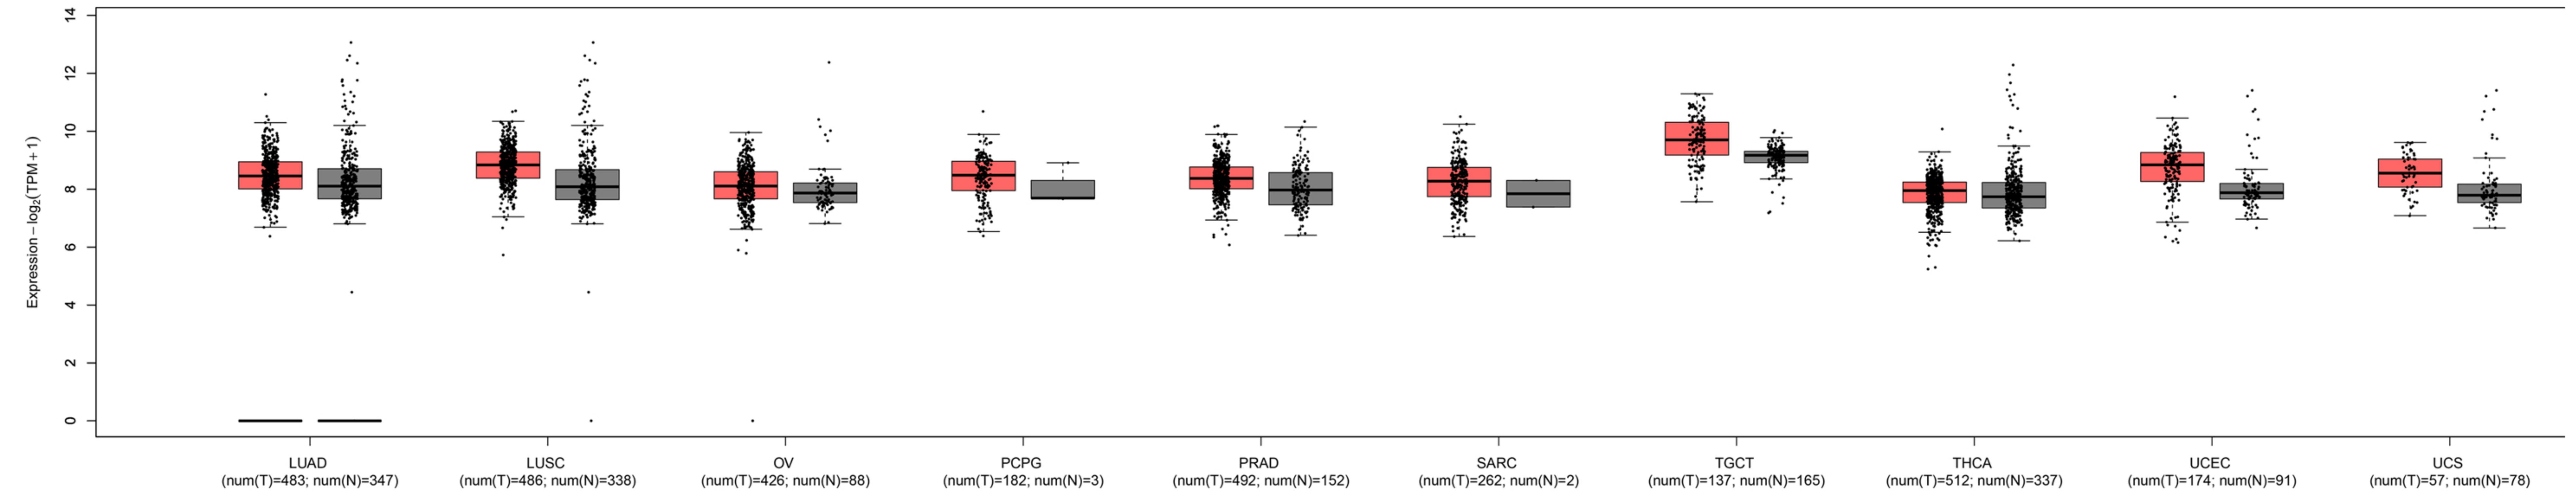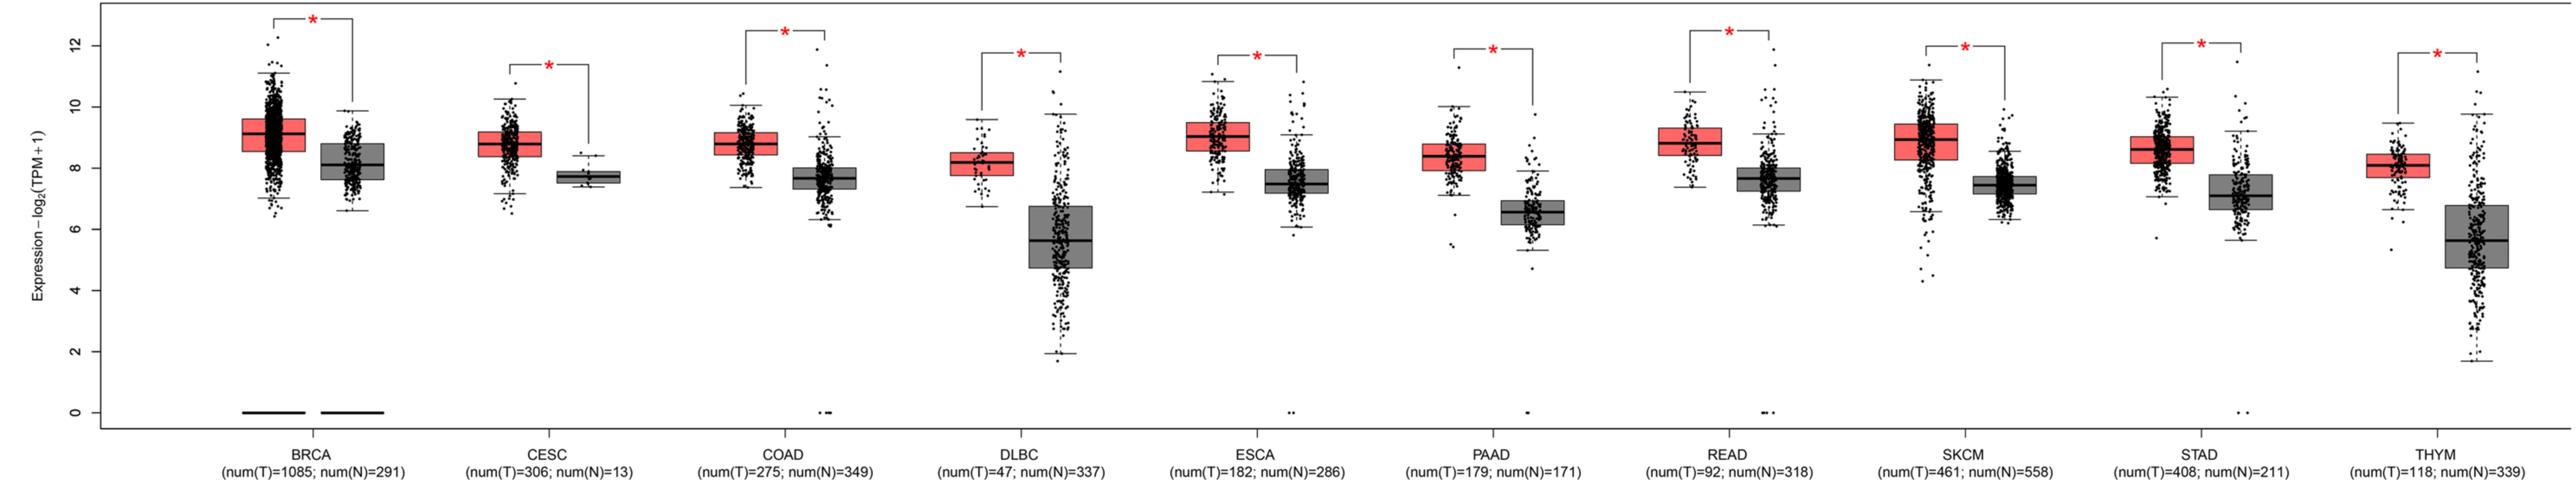

Supplement: Supplemental_Figure_1.pdf [file Supplemental_Figure_1.pdf]
